# Supplementary material for: Zinc transport from the endoplasmic reticulum to the cytoplasm via Zip7 is necessary for barrier dysfunction mediated by inflammatory signaling in RPE cells
Source: PubMed Central journal article supplement (PMC9333247; doi:10.1371/journal.pone.0271656), 2022-07-28

Fig2A

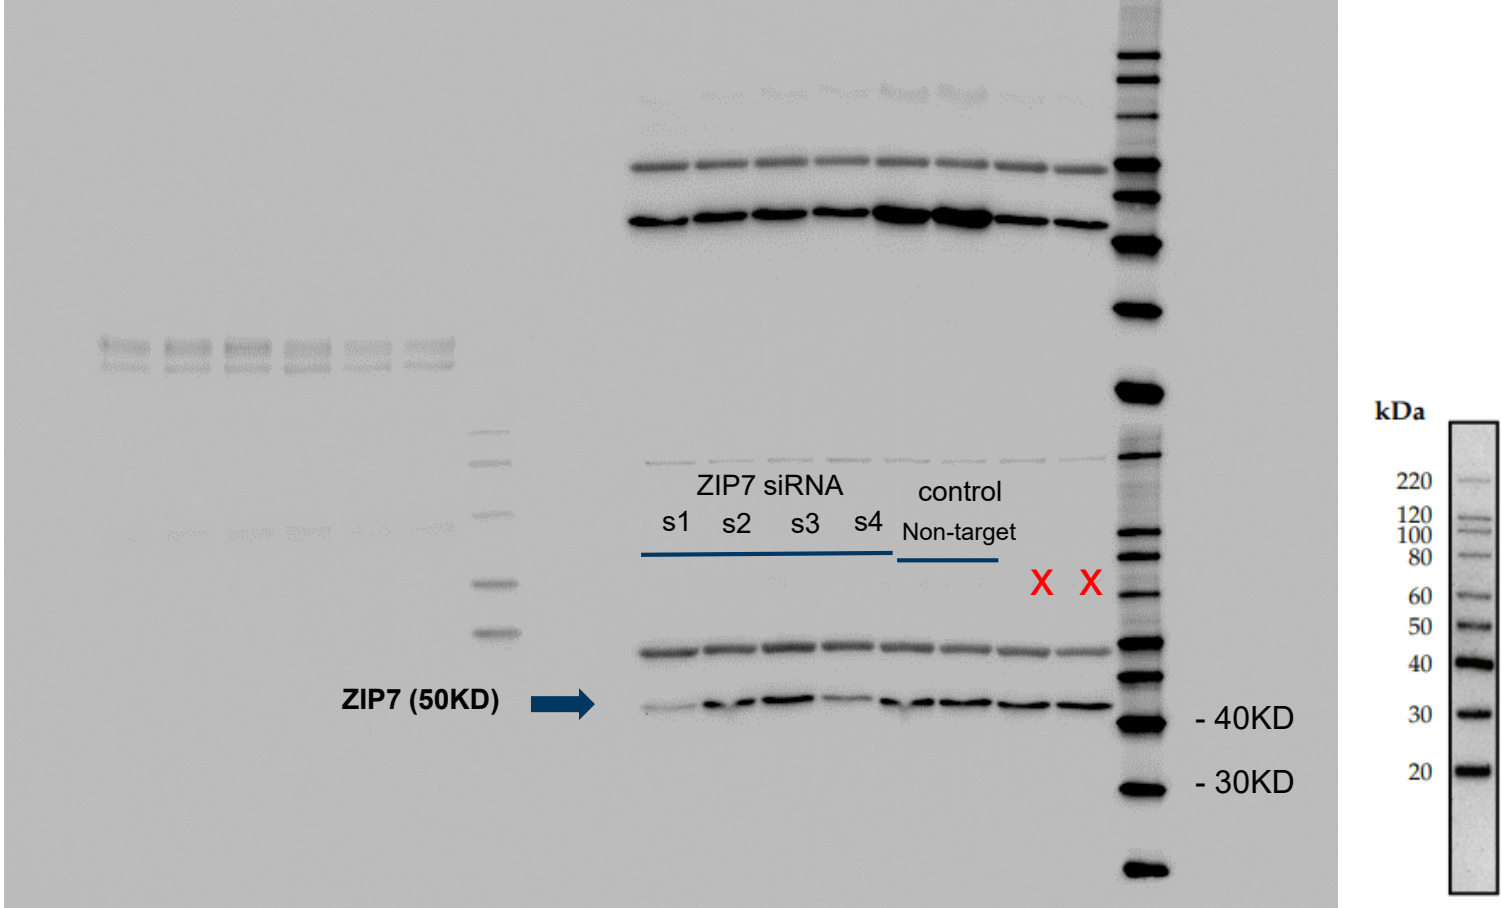

Fig2A

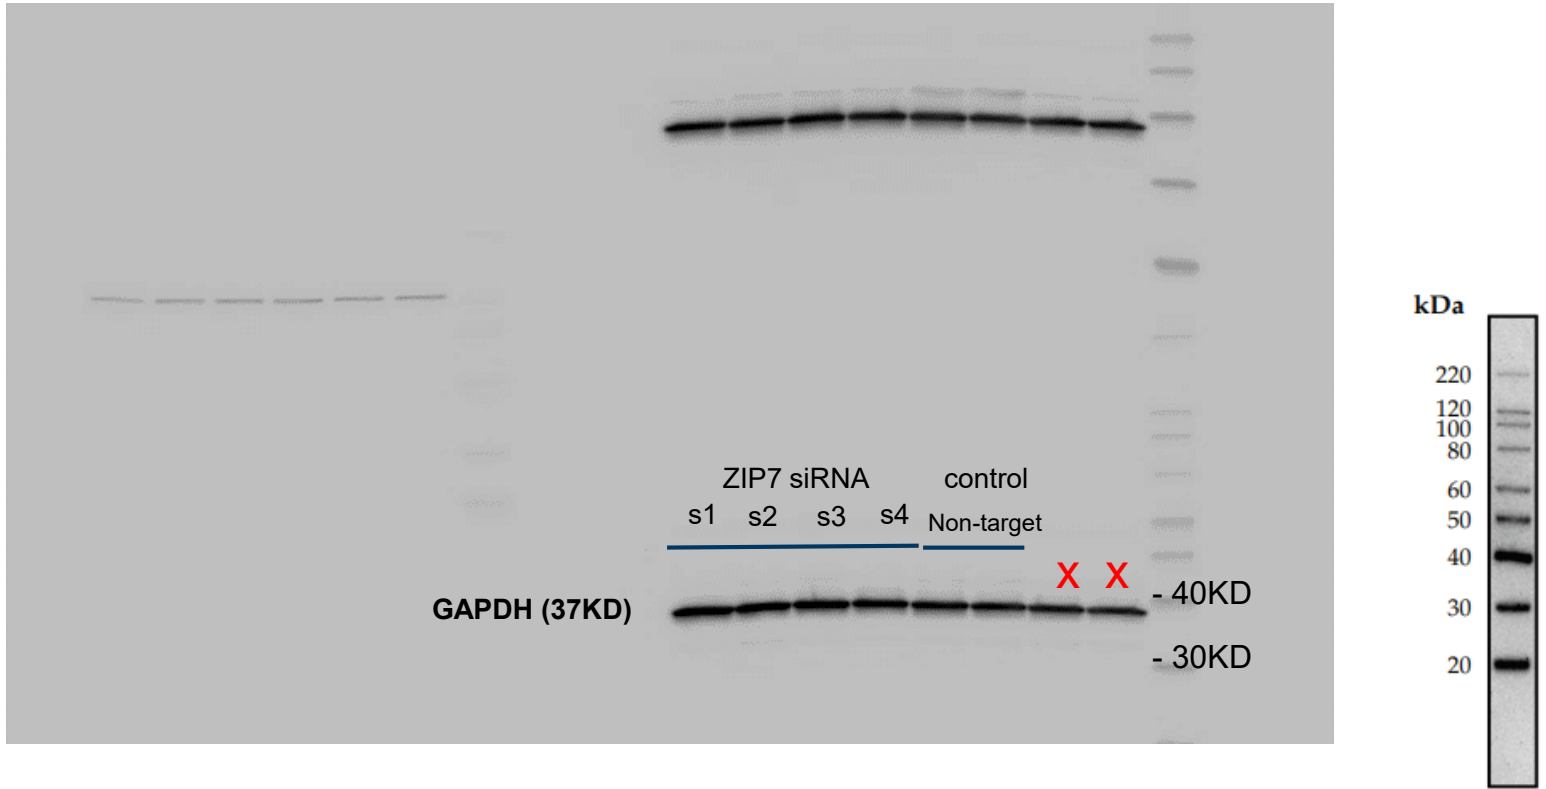

Fig2A

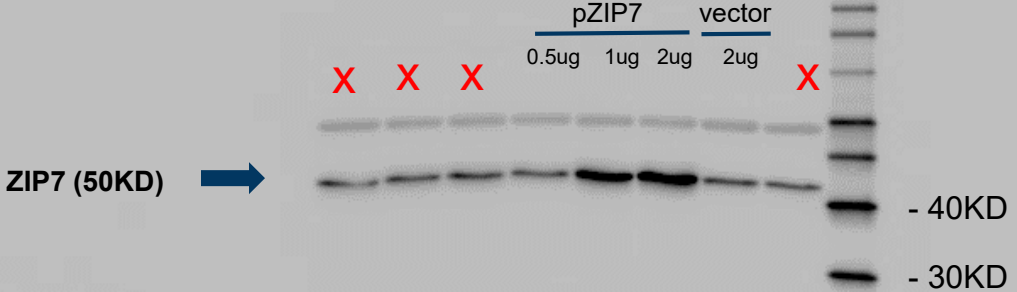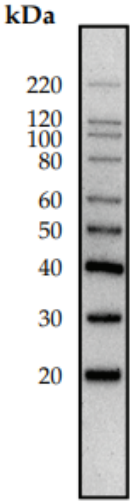

Fig2A

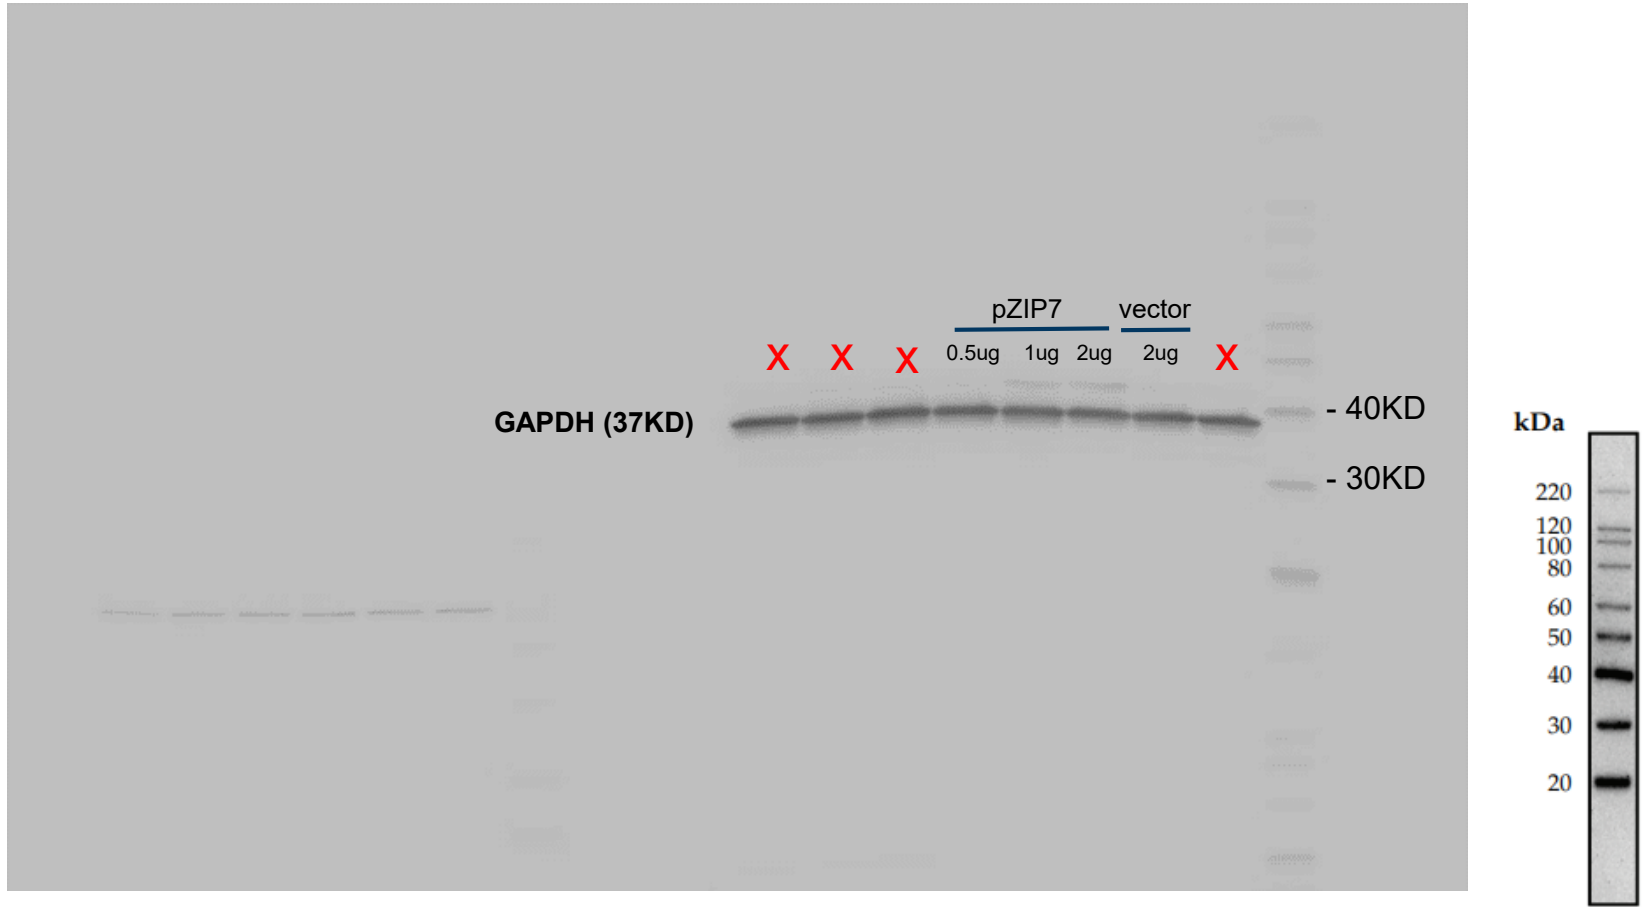

Fig 3B

|                           |   |   |   |   |   |   |   |
|---------------------------|---|---|---|---|---|---|---|
| IL1 $\beta$ +TNF $\alpha$ | - | + | - | - | + | + | - |
| NVS-ZP7-4                 | - | - | + | - | + | - | - |
| NVS-ZP7-6                 | - | - | - | + | - | + | - |
| Tunicamycin               | - | - | - | - | - | - | + |

Occludin (65KD)

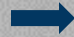

X

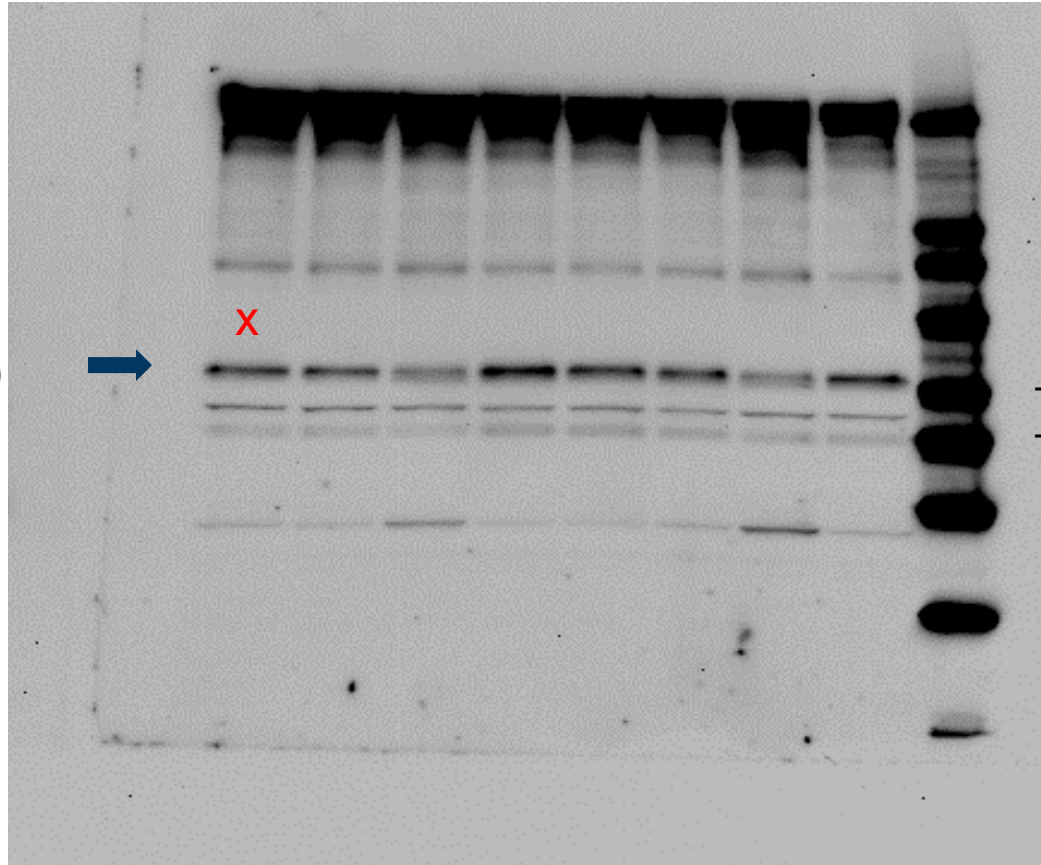

- 60KD  
- 50KD

kDa

220  
120  
100  
80  
60  
50  
40  
30  
20

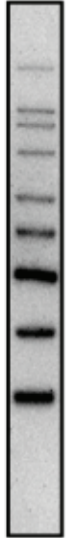

Fig 3B

|                           |   |   |   |   |   |   |   |
|---------------------------|---|---|---|---|---|---|---|
| IL1 $\beta$ +TNF $\alpha$ | - | + | - | - | + | + | - |
| NVS-ZP7-4                 | - | - | + | - | + | - | - |
| NVS-ZP7-6                 | - | - | - | + | - | + | - |
| Tunicamycin               | - | - | - | - | - | - | + |

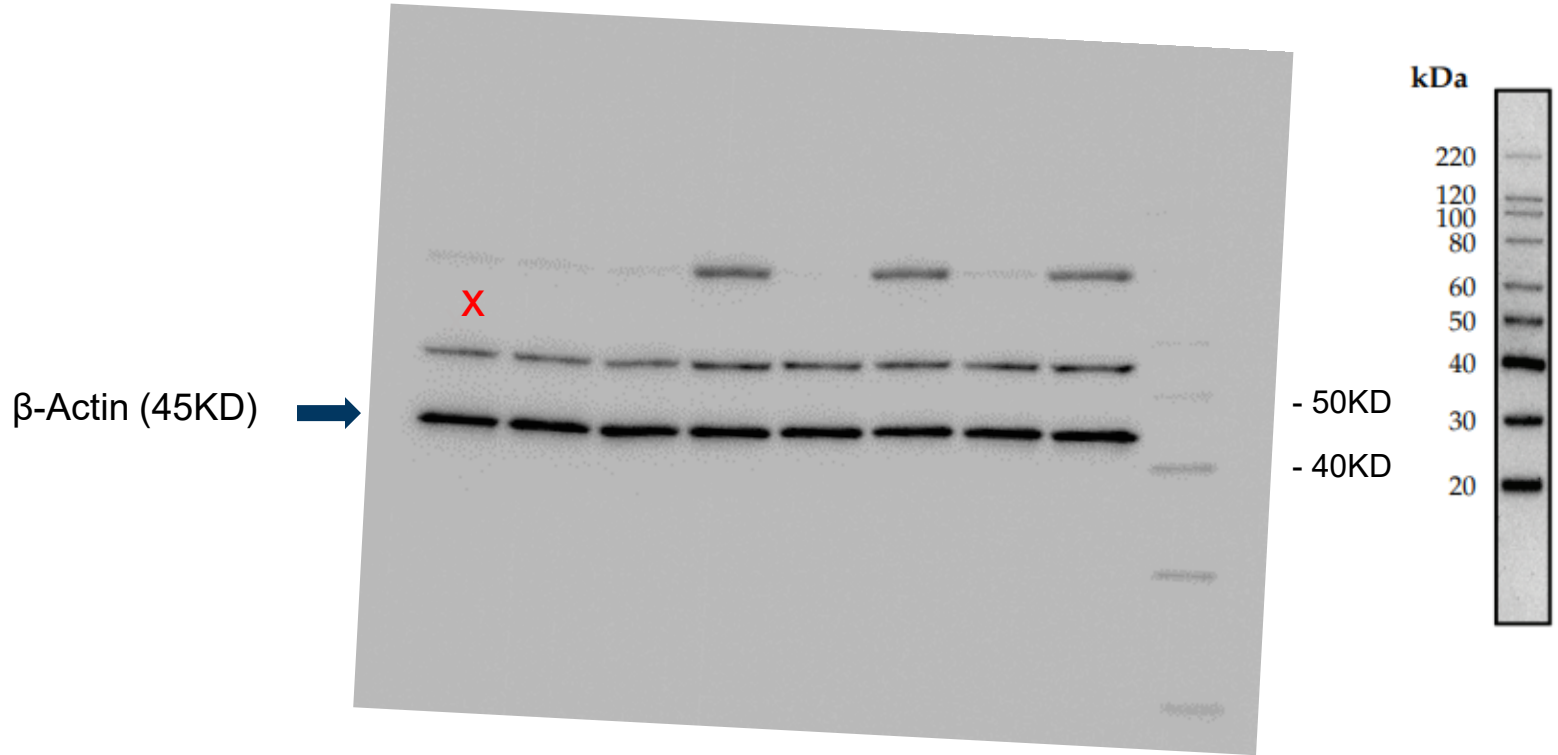

Fig 3B

|                           |   |   |   |   |   |   |   |
|---------------------------|---|---|---|---|---|---|---|
| IL1 $\beta$ +TNF $\alpha$ | - | + | - | - | + | + | - |
| NVS-ZP7-4                 | - | - | + | - | + | - | - |
| NVS-ZP7-6                 | - | - | - | + | - | + | - |
| Tunicamycin               | - | - | - | - | - | - | + |

Cox2 (74KD)

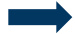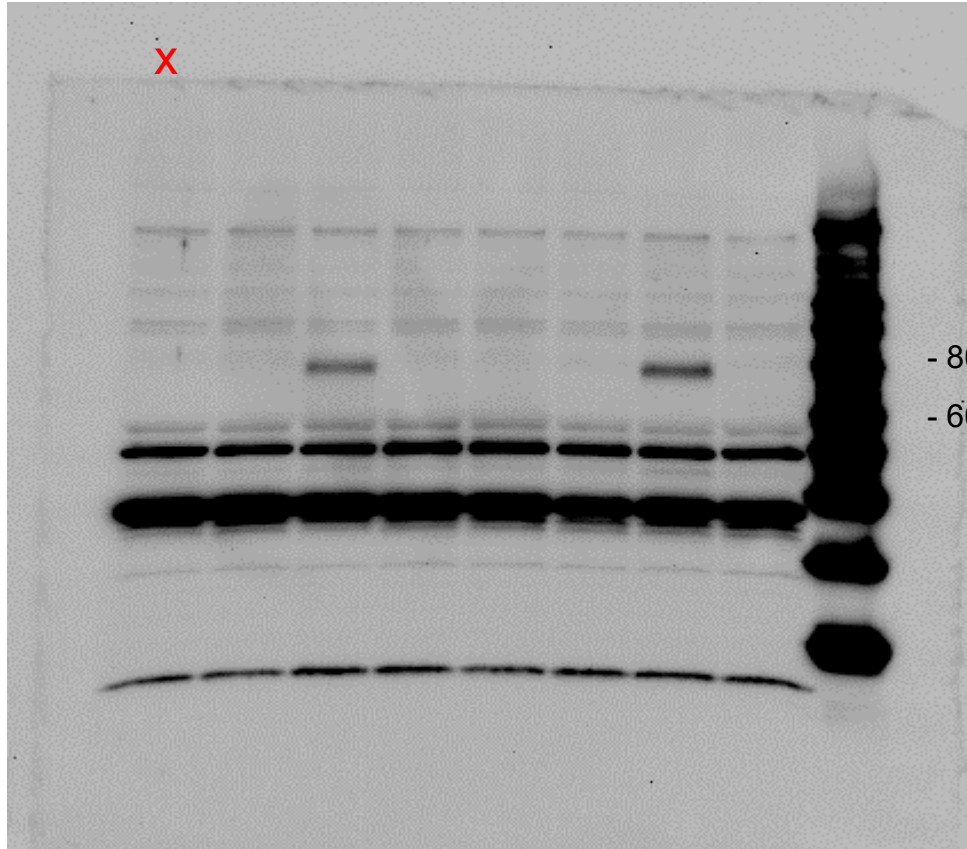

kDa

220  
120  
100  
80  
60  
50  
40  
30  
20

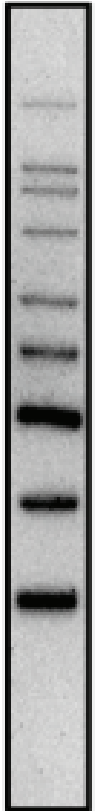

Fig 3B

|                           |   |   |   |   |   |   |   |
|---------------------------|---|---|---|---|---|---|---|
| IL1 $\beta$ +TNF $\alpha$ | - | + | - | - | + | + | - |
| NVS-ZP7-4                 | - | - | + | - | + | - | - |
| NVS-ZP7-6                 | - | - | - | + | - | + | - |
| Tunicamycin               | - | - | - | - | - | - | + |

$\beta$ -Actin (45KD)

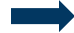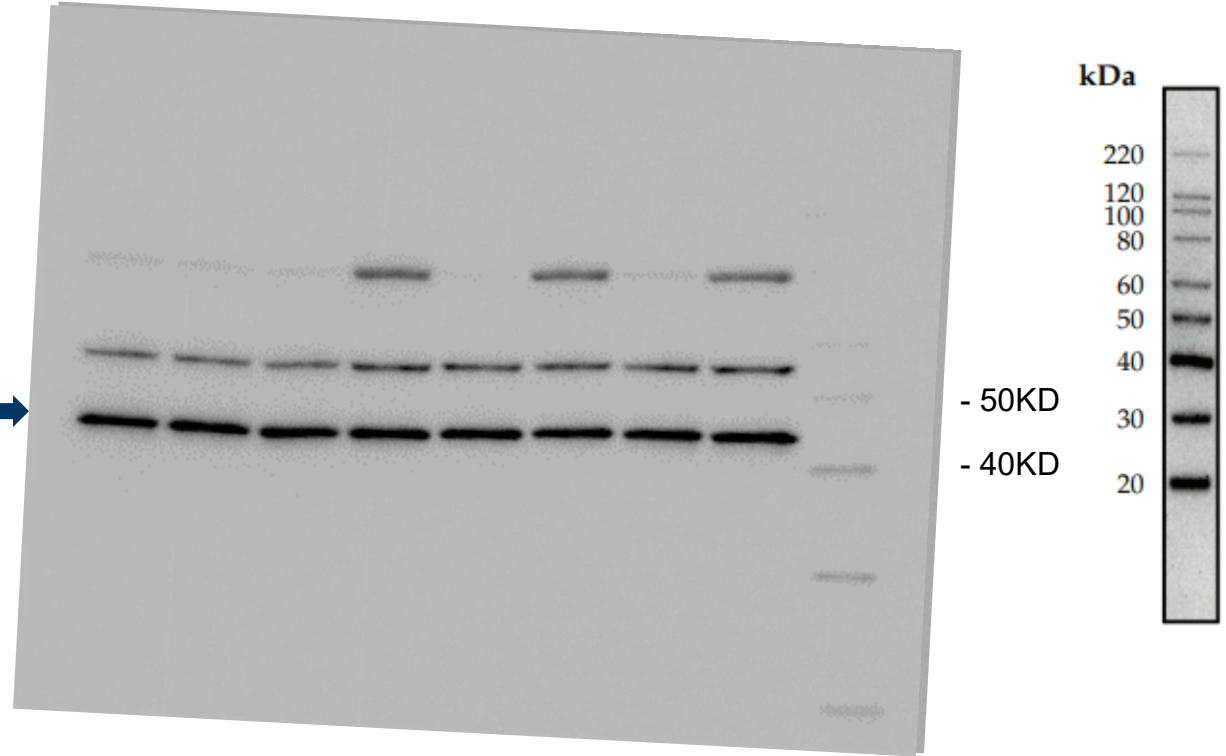



Fig 4D

|                           |   |   |   |   |   |   |   |   |
|---------------------------|---|---|---|---|---|---|---|---|
| IL1 $\beta$ /TNF $\alpha$ | - | + | - | + | - | - | + | + |
| NVS-ZP7-4                 | - | - | + | + | - | + | - | + |
| Zn/Pyr                    | - | - | - | - | + | + | + | + |

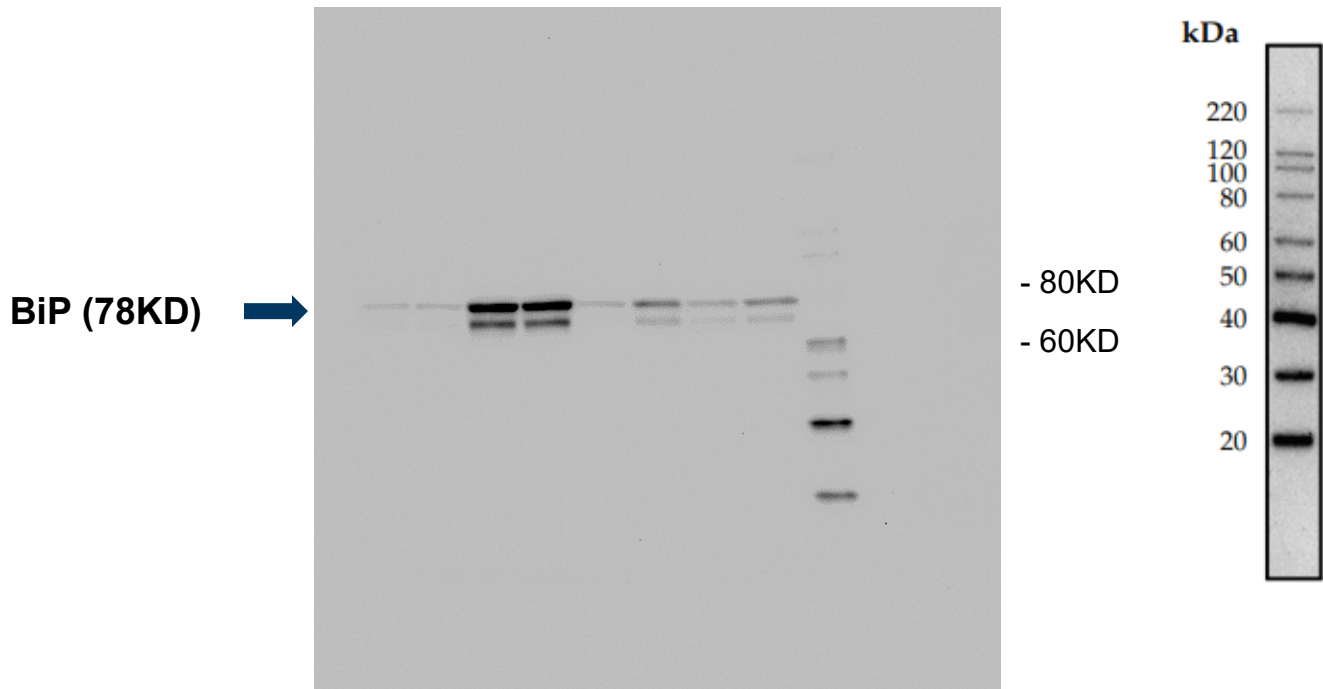

Fig 4D

|                           |   |   |   |   |   |   |   |   |
|---------------------------|---|---|---|---|---|---|---|---|
| IL1 $\beta$ /TNF $\alpha$ | - | + | - | + | - | - | + | + |
| NVS-ZP7-4                 | - | - | + | + | - | + | - | + |
| Zn/Pyrr                   | - | - | - | - | + | + | + | + |

CHOP (29KD) →

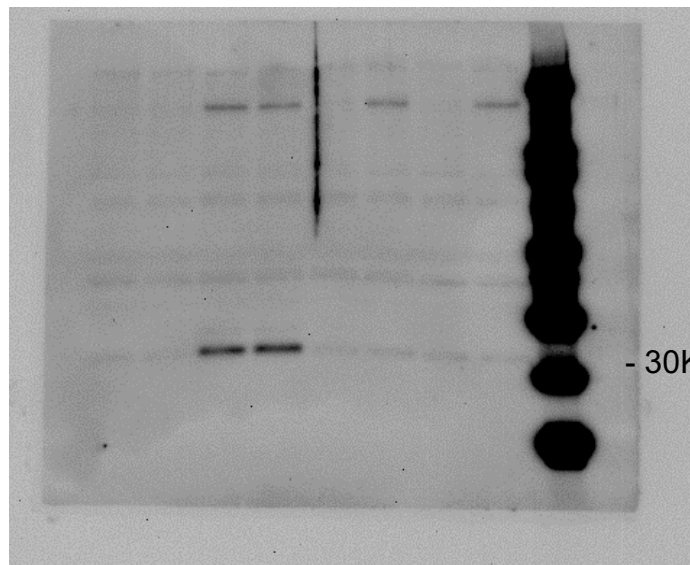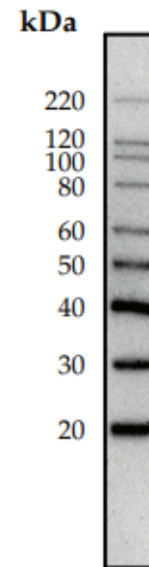

Fig 4D

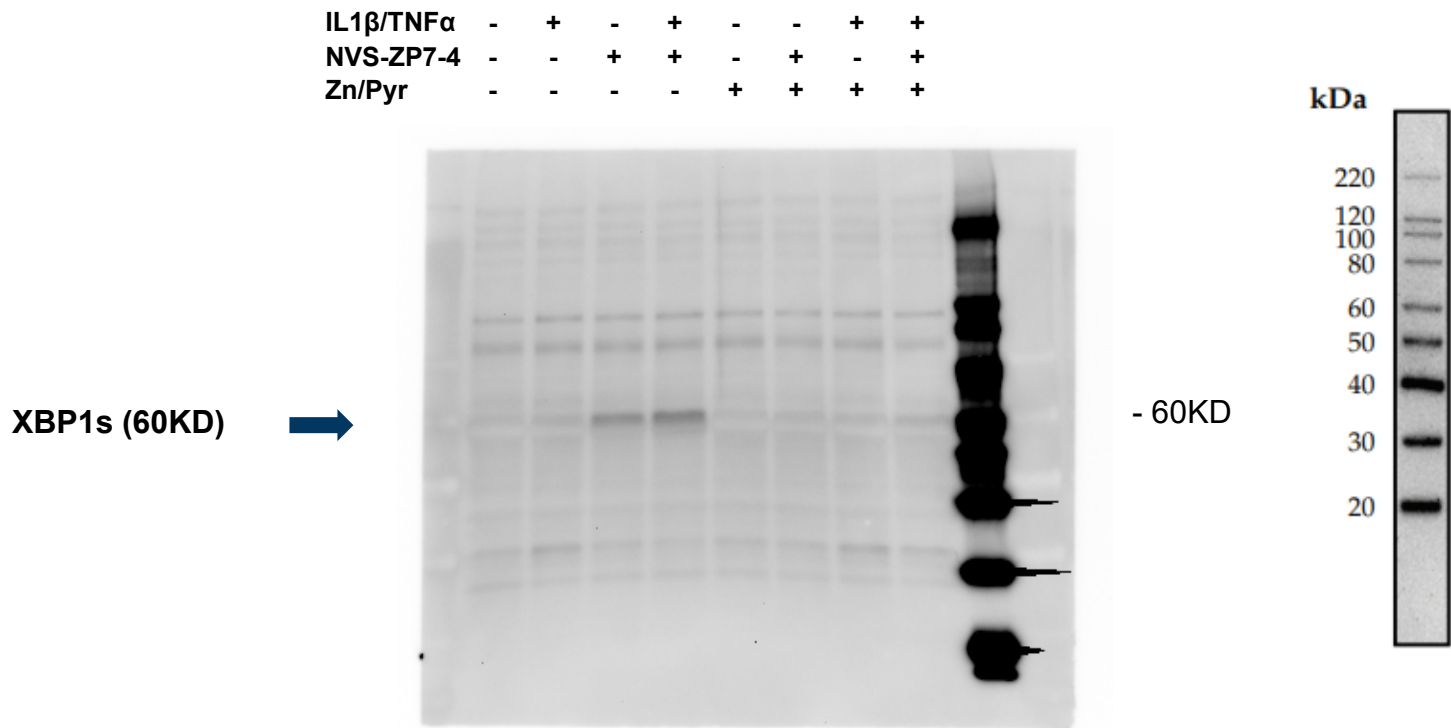

Fig 4D

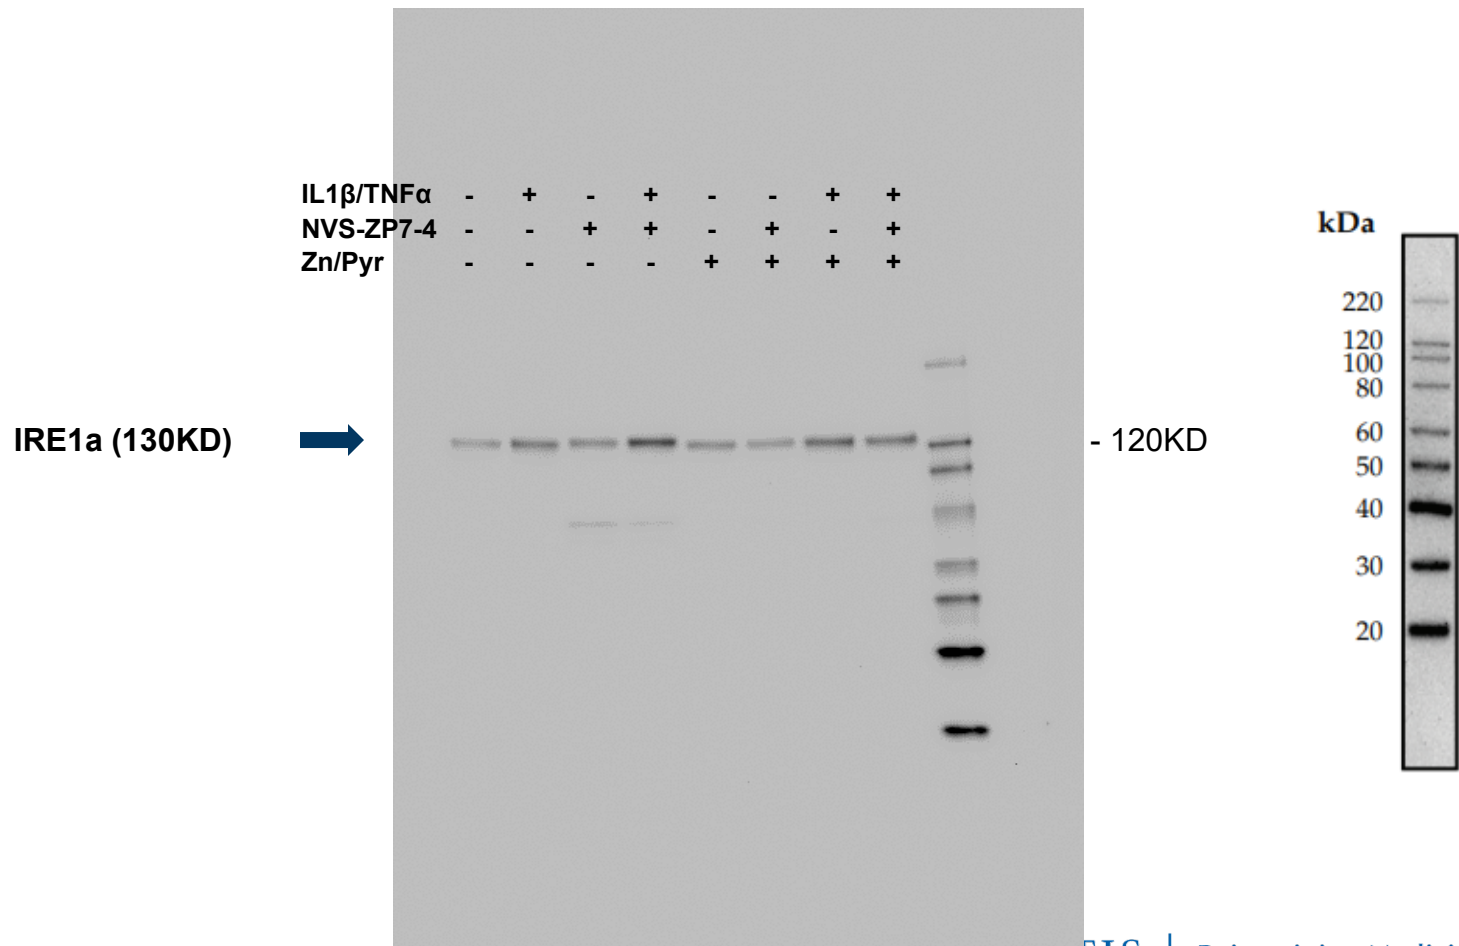

Fig 4D

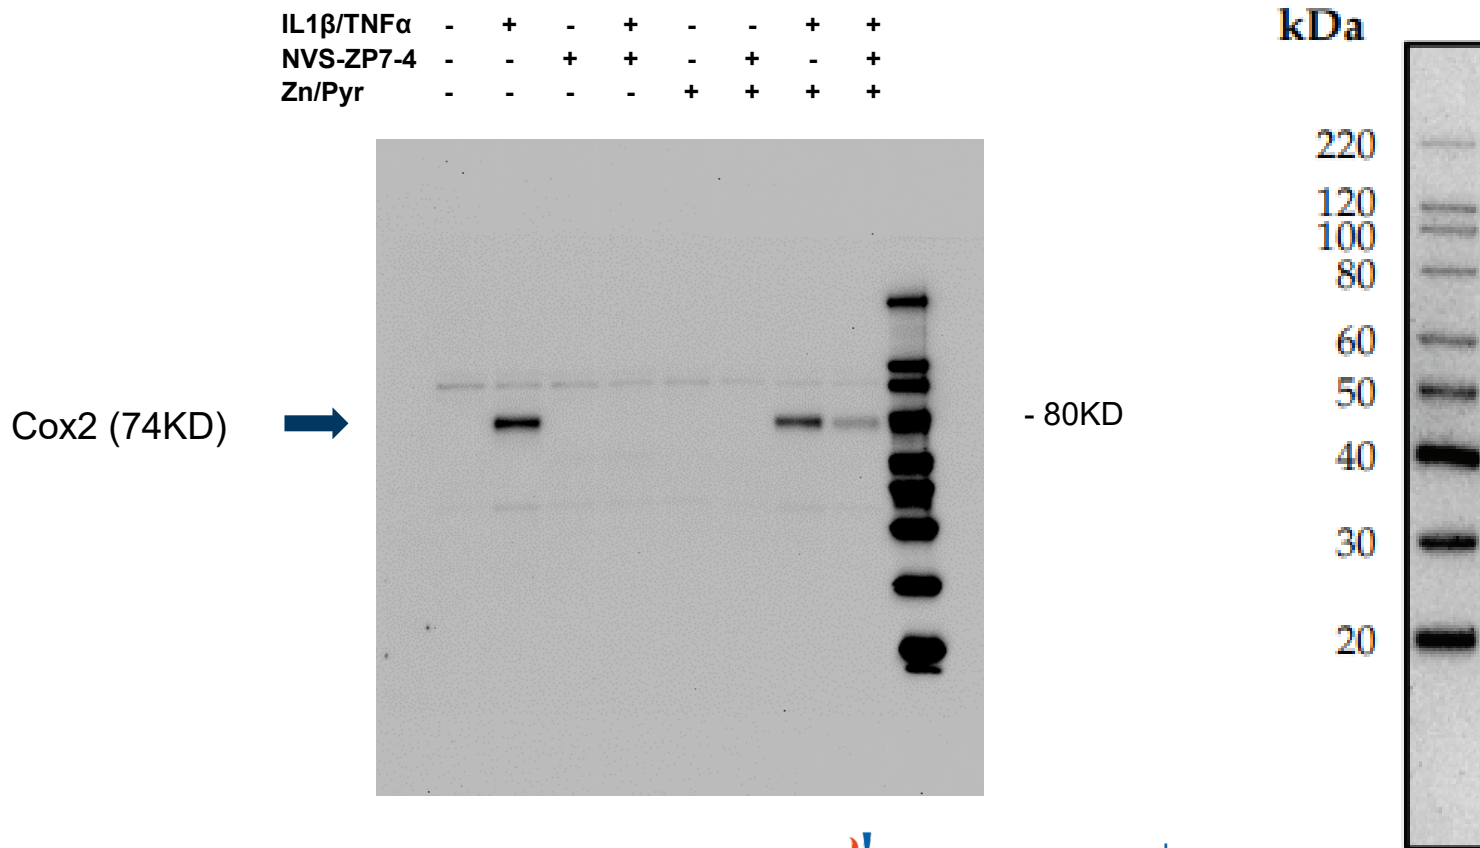

Fig 4D

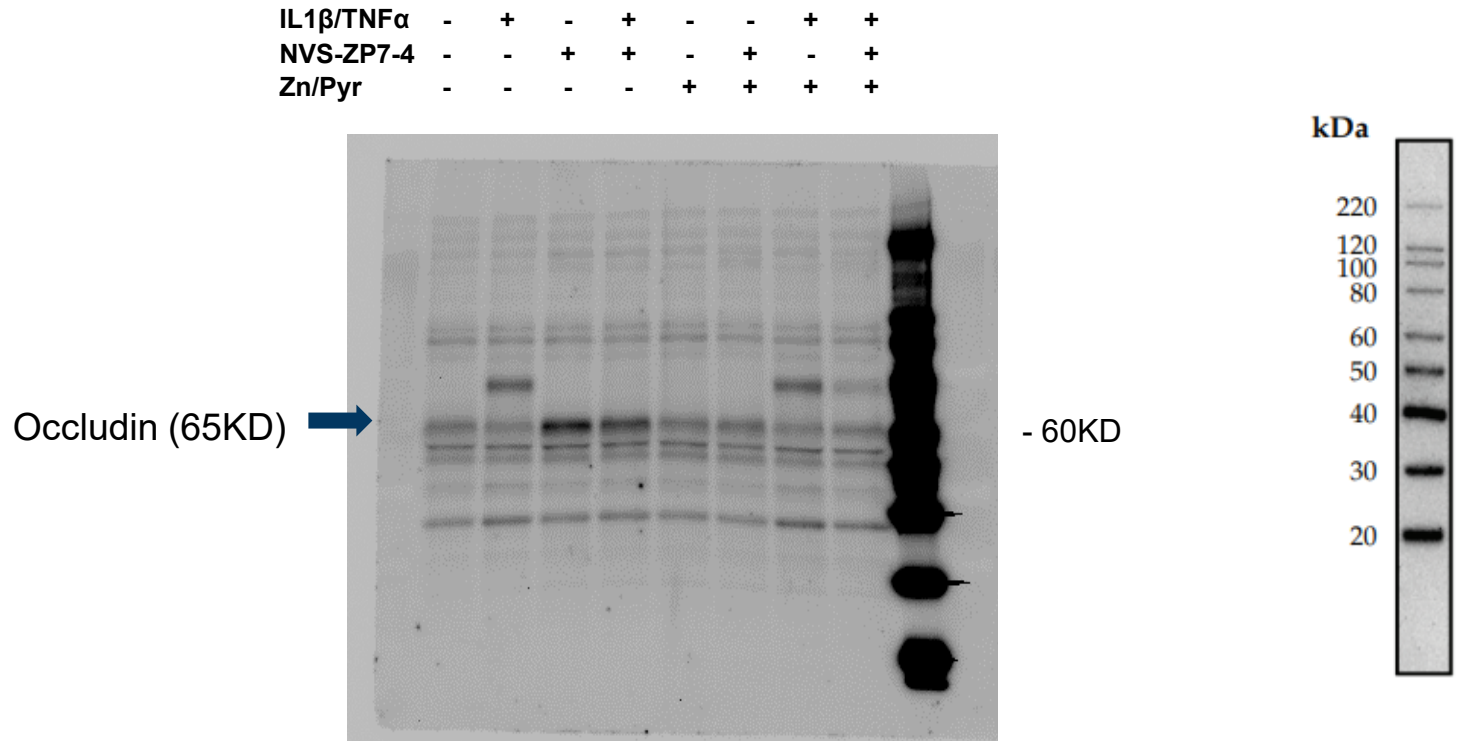

Fig 4D

|                           |   |   |   |   |   |   |   |   |
|---------------------------|---|---|---|---|---|---|---|---|
| IL1 $\beta$ /TNF $\alpha$ | - | + | - | + | - | - | + | + |
| NVS-ZP7-4                 | - | - | + | + | - | + | - | + |
| Zn/Pyr                    | - | - | - | - | + | + | + | + |

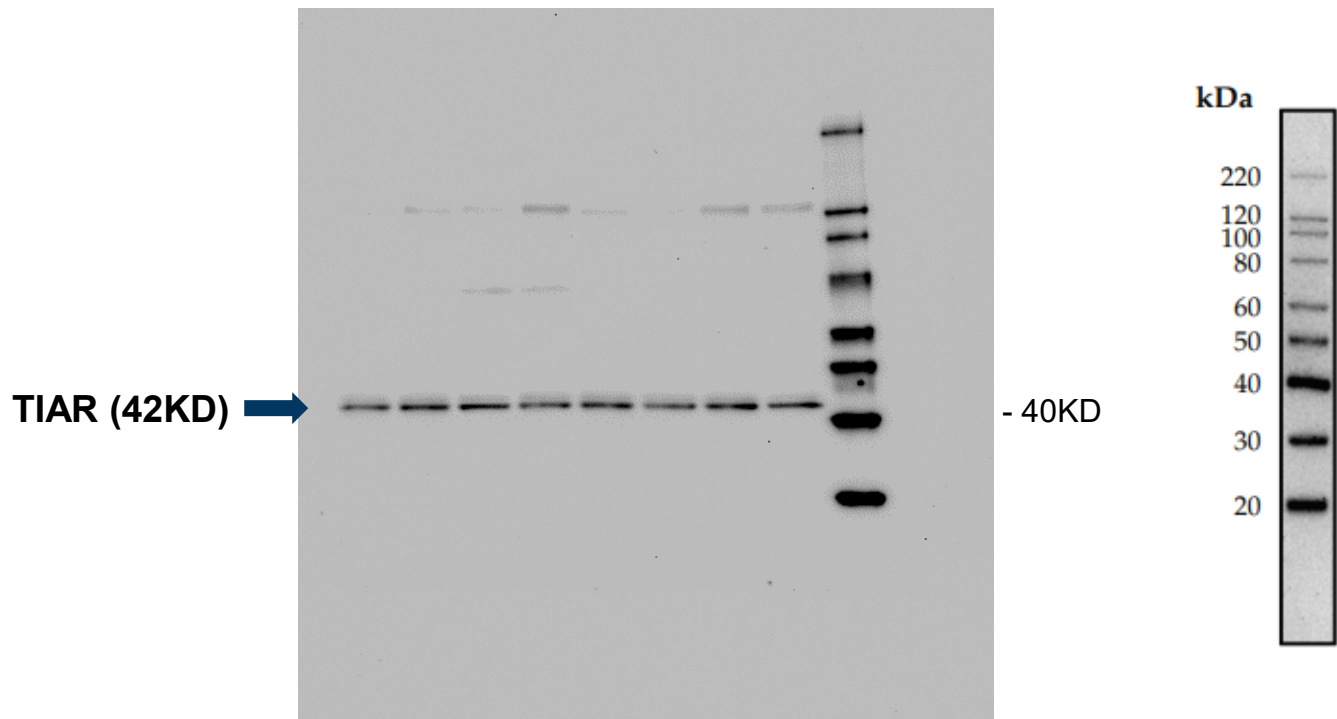

Fig 4D

|                           |   |   |   |   |   |   |   |   |
|---------------------------|---|---|---|---|---|---|---|---|
| IL1 $\beta$ /TNF $\alpha$ | - | + | - | + | - | - | + | + |
| NVS-ZP7-4                 | - | - | + | + | - | + | - | + |
| Zn/Pyr                    | - | - | - | - | + | + | + | + |

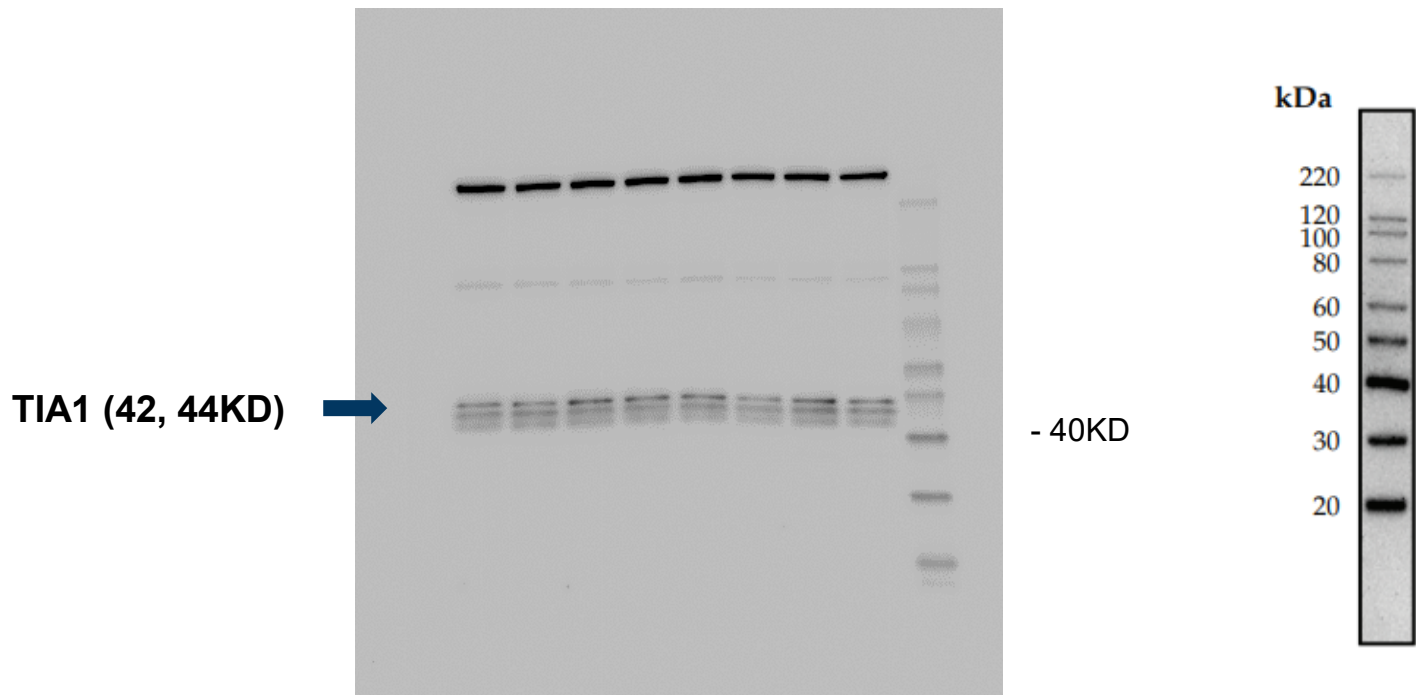



Fig 4D

|                           |   |   |   |   |   |   |   |   |
|---------------------------|---|---|---|---|---|---|---|---|
| IL1 $\beta$ /TNF $\alpha$ | - | + | - | + | - | - | + | + |
| NVS-ZP7-4                 | - | - | + | + | - | + | - | + |
| Zn/Pyr                    | - | - | - | - | + | + | + | + |

$\beta$ -Actin (45KD) 

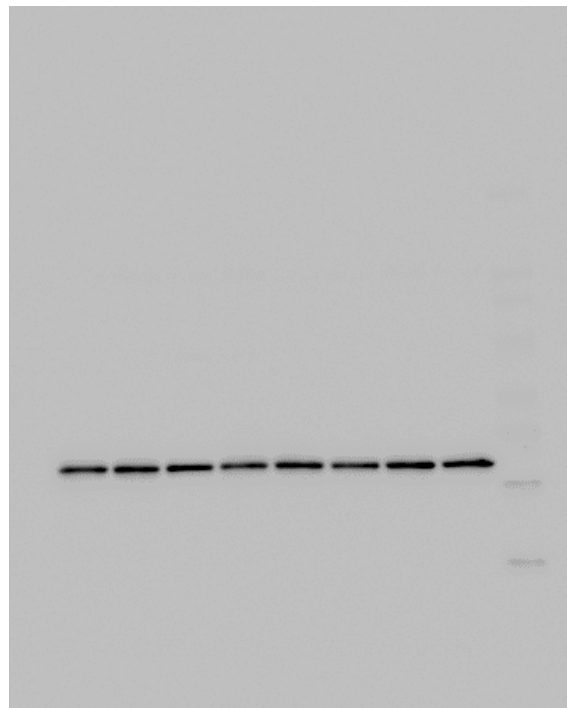

- 40KD

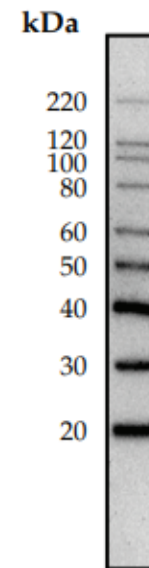

Fig 5A

IRE1a (130KD)

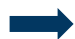

|             |   |   |   |   |   |   |   |
|-------------|---|---|---|---|---|---|---|
| IL1b+TNFa   | - | + | - | - | + | + | - |
| NVS-ZP7-4   | - | - | + | - | + | - | - |
| NVS-ZP7-6   | - | - | - | + | - | + | - |
| Tunicamycin | - | - | - | - | - | - | + |

X

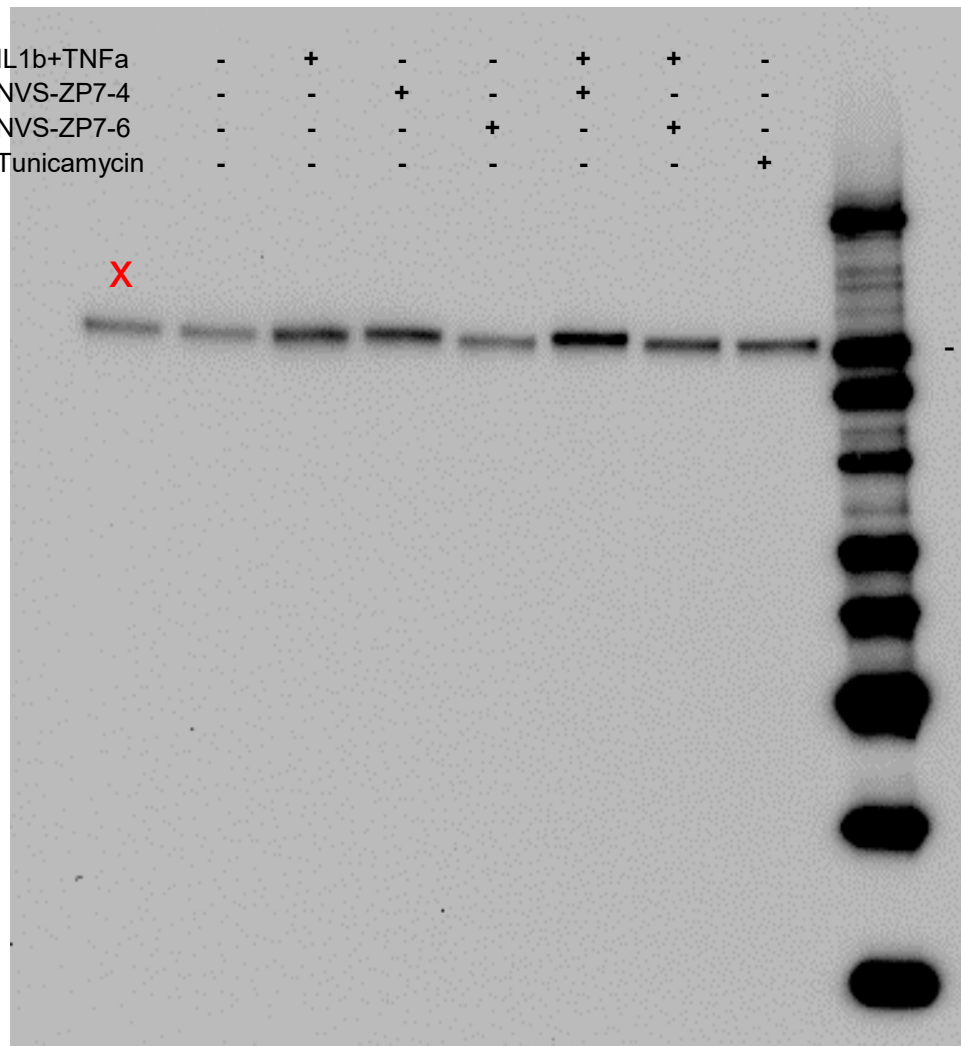

kDa

220

120

100

80

60

50

40

30

20

- 120KD

Fig 5A

|             |   |   |   |   |   |   |   |
|-------------|---|---|---|---|---|---|---|
| IL1b+TNFa   | - | + | - | - | + | + | - |
| NVS-ZP7-4   | - | - | + | - | + | - | - |
| NVS-ZP7-6   | - | - | - | + | - | + | - |
| Tunicamycin | - | - | - | - | - | - | + |

XBP1s (60KD)

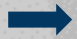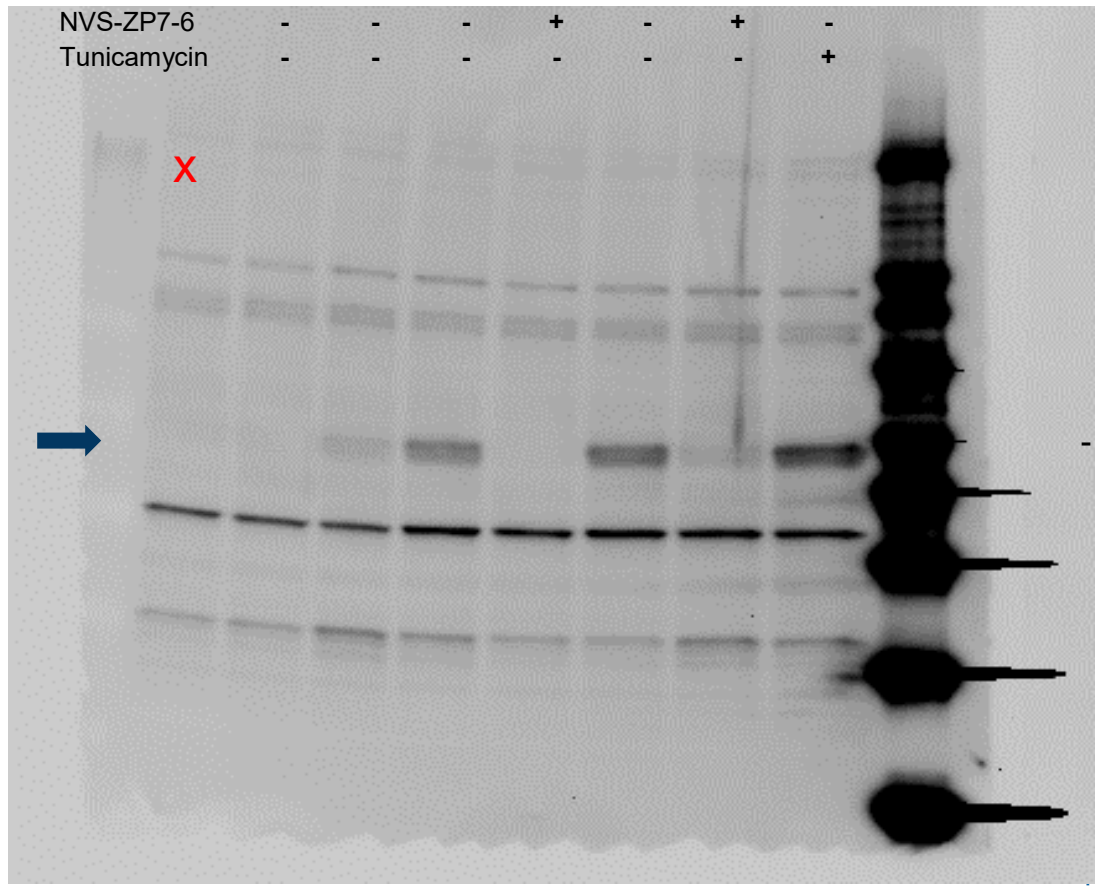

60KD

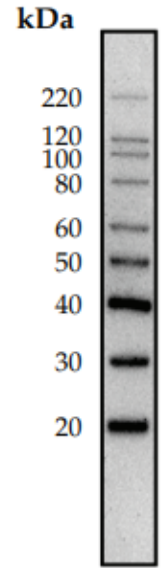

Fig 5A

|             |   |   |   |   |   |   |   |
|-------------|---|---|---|---|---|---|---|
| IL1b+TNFa   | - | + | - | - | + | + | - |
| NVS-ZP7-4   | - | - | + | - | + | - | - |
| NVS-ZP7-6   | - | - | - | + | - | + | - |
| Tunicamycin | - | - | - | - | - | - | + |

CHOP (29KD) →

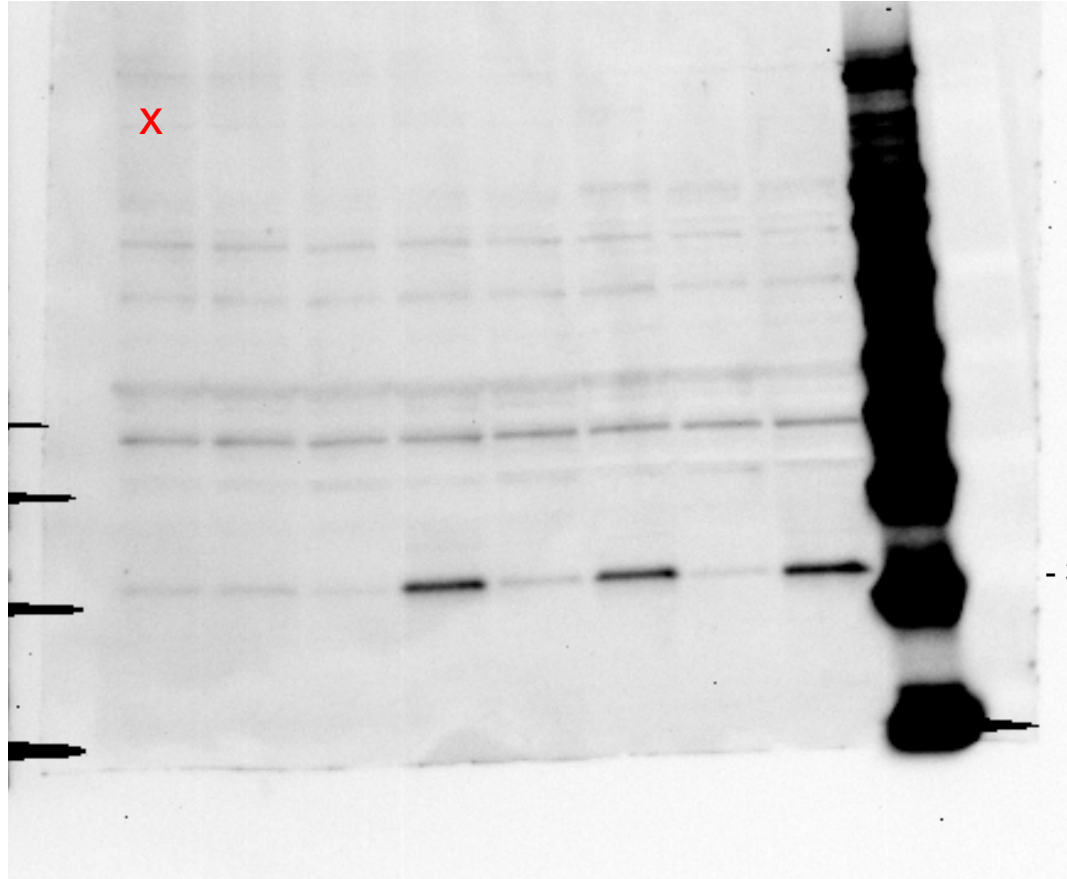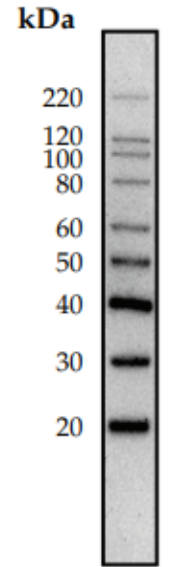

- 30KD

Fig 5A

PERK (140KD)

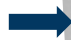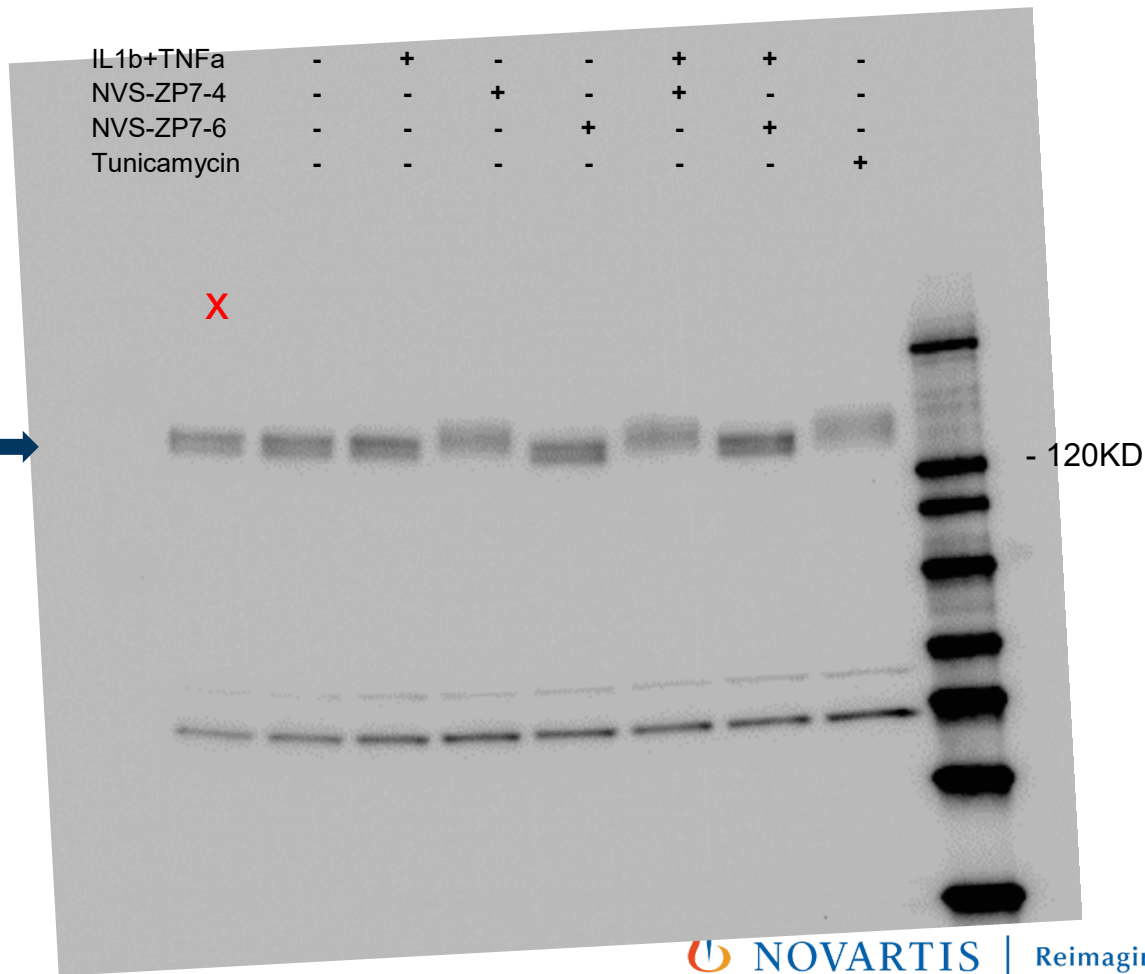

Fig 5A

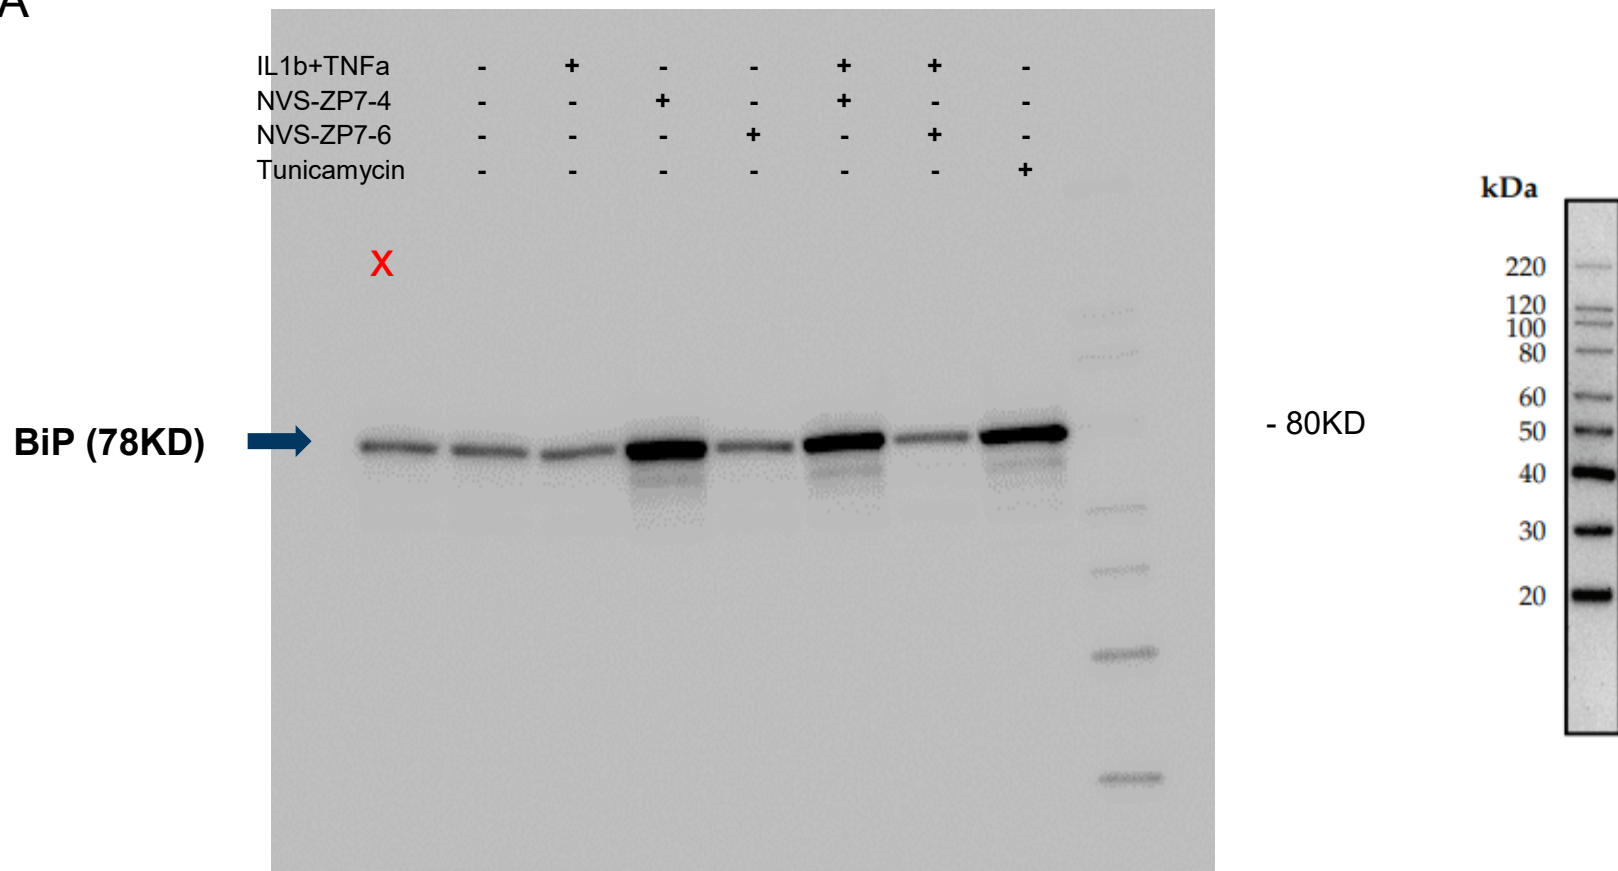

Fig 5A

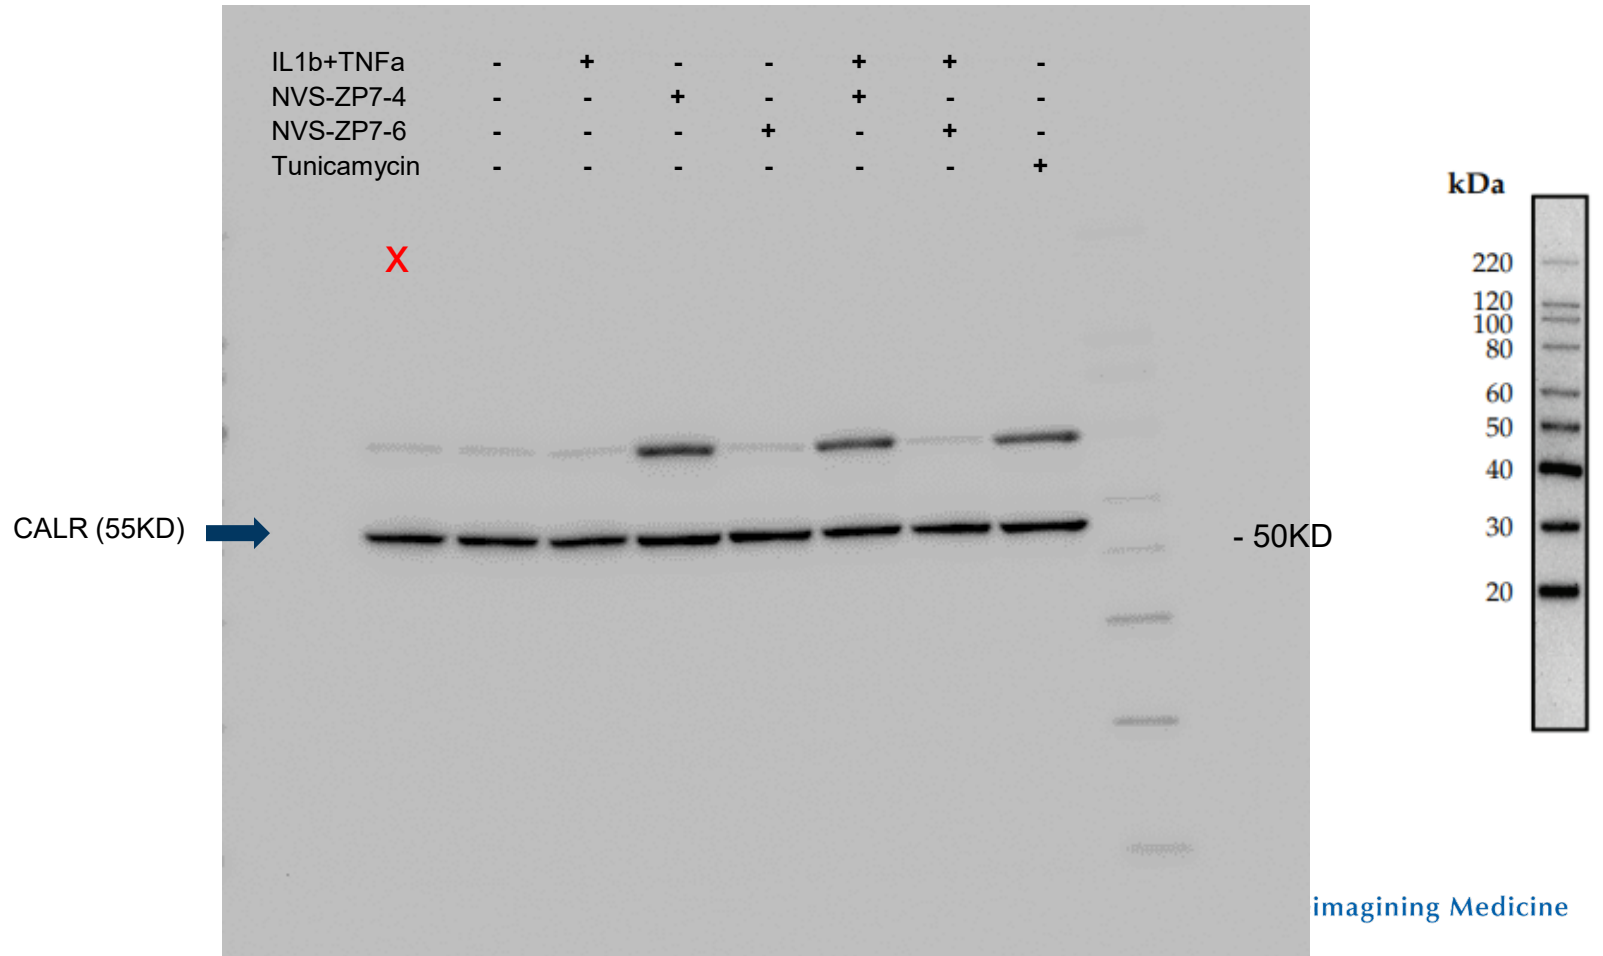

Fig 5A

$\beta$ -Actin (45KD) 

|             |   |   |   |   |   |   |   |
|-------------|---|---|---|---|---|---|---|
| IL1b+TNFa   | - | + | - | - | + | + | - |
| NVS-ZP7-4   | - | - | + | - | + | - | - |
| NVS-ZP7-6   | - | - | - | + | - | + | - |
| Tunicamycin | - | - | - | - | - | - | + |

X

- 40KD

kDa

220  
120  
100  
80  
60  
50  
40  
30  
20

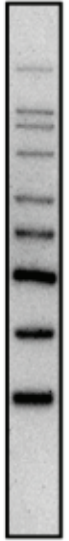



Fig S5

|                           |   |   |   |   |   |   |   |   |
|---------------------------|---|---|---|---|---|---|---|---|
| IL1 $\beta$ /TNF $\alpha$ | - | + | - | + | - | - | + | + |
| NVS-ZP7-4                 | - | - | + | + | - | + | - | + |
| Zn/Pyr                    | - | - | - | - | + | + | + | + |

BiP (78KD) →

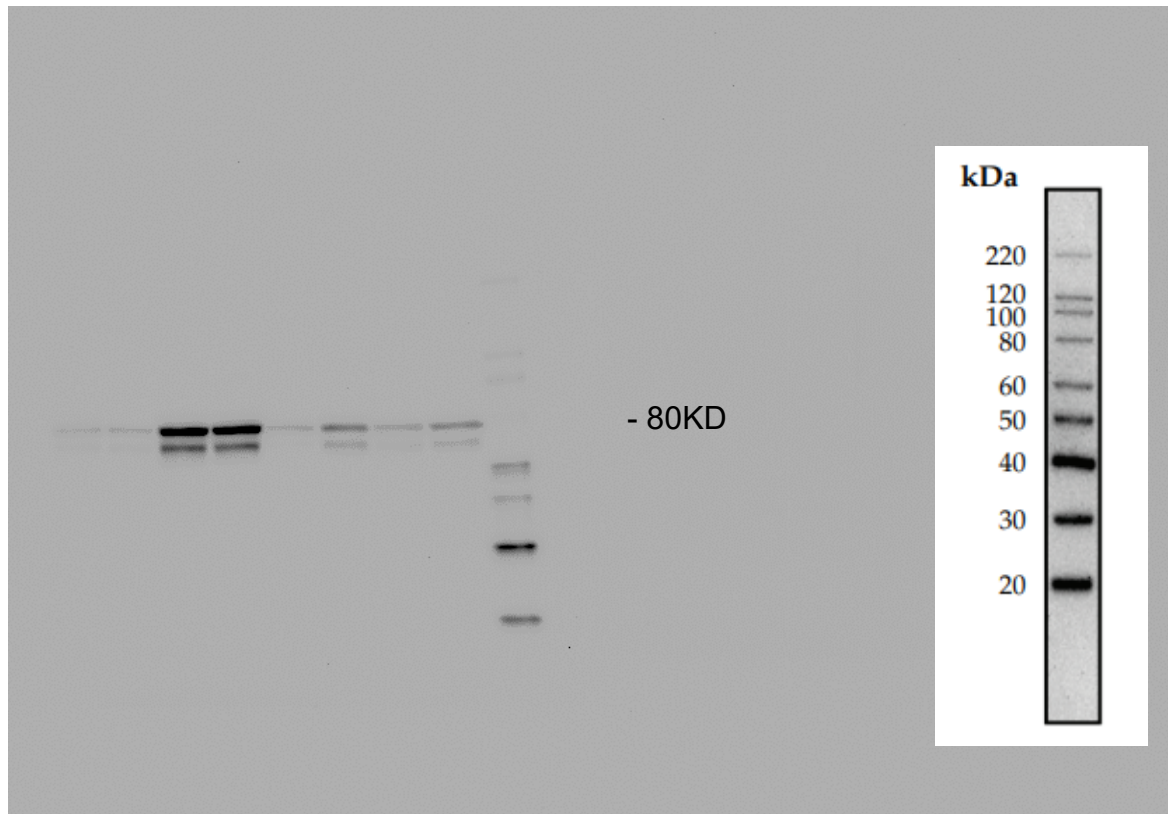

Fig S5

|                           |   |   |   |   |   |   |   |   |
|---------------------------|---|---|---|---|---|---|---|---|
| IL1 $\beta$ /TNF $\alpha$ | - | + | - | + | - | - | + | + |
| NVS-ZP7-4                 | - | - | + | + | - | + | - | + |
| Zn/Pyr                    | - | - | - | - | + | + | + | + |

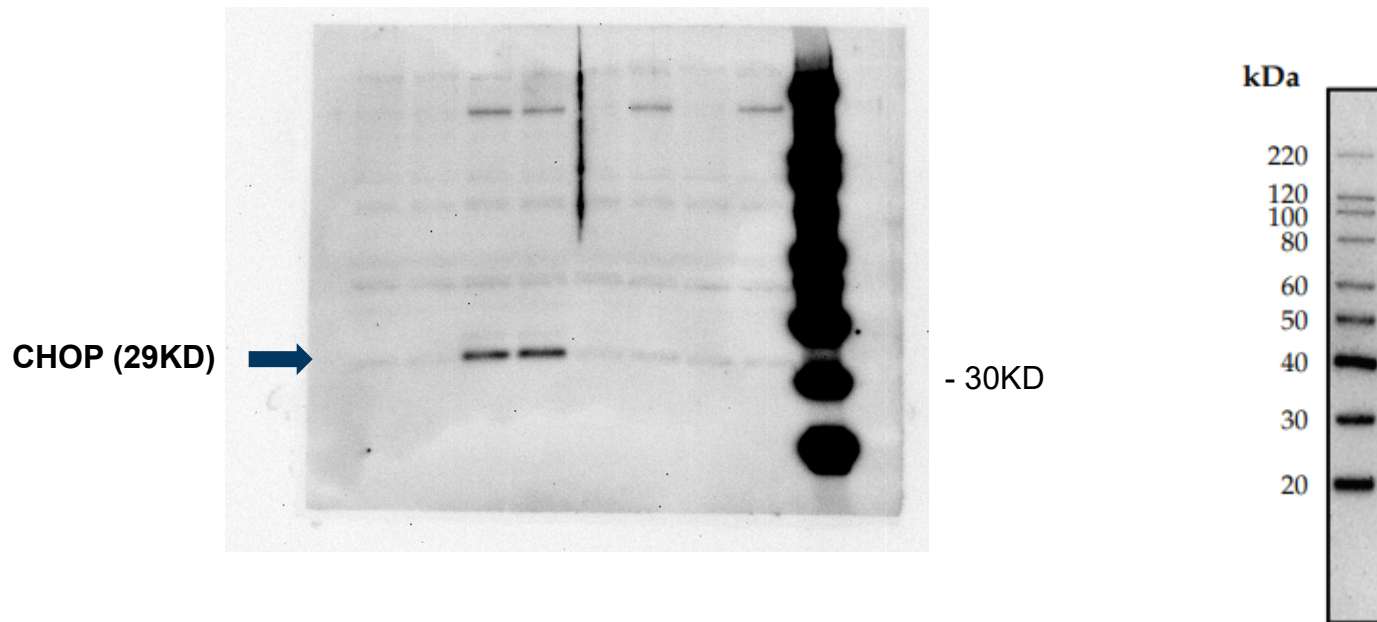

Fig S5

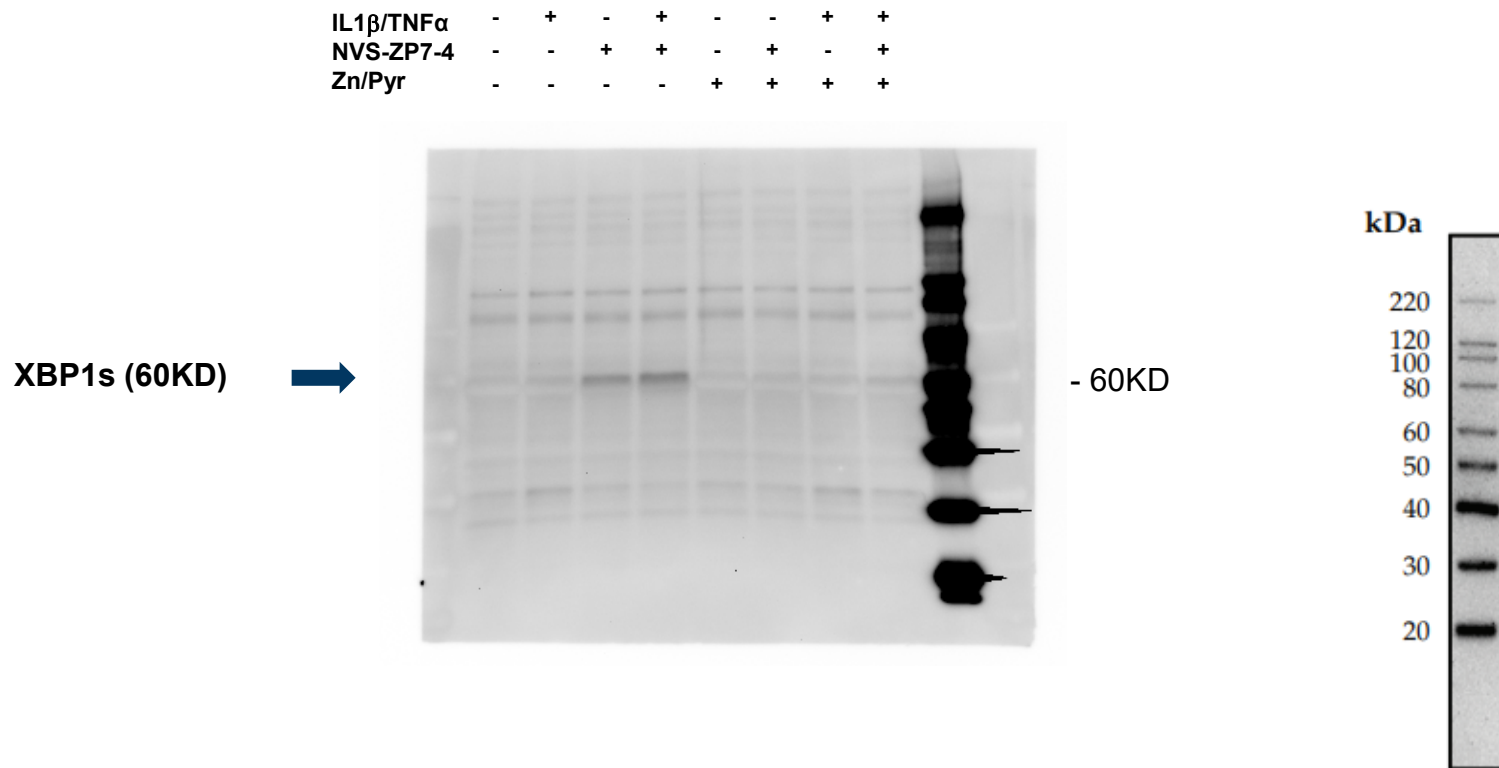

Fig S5

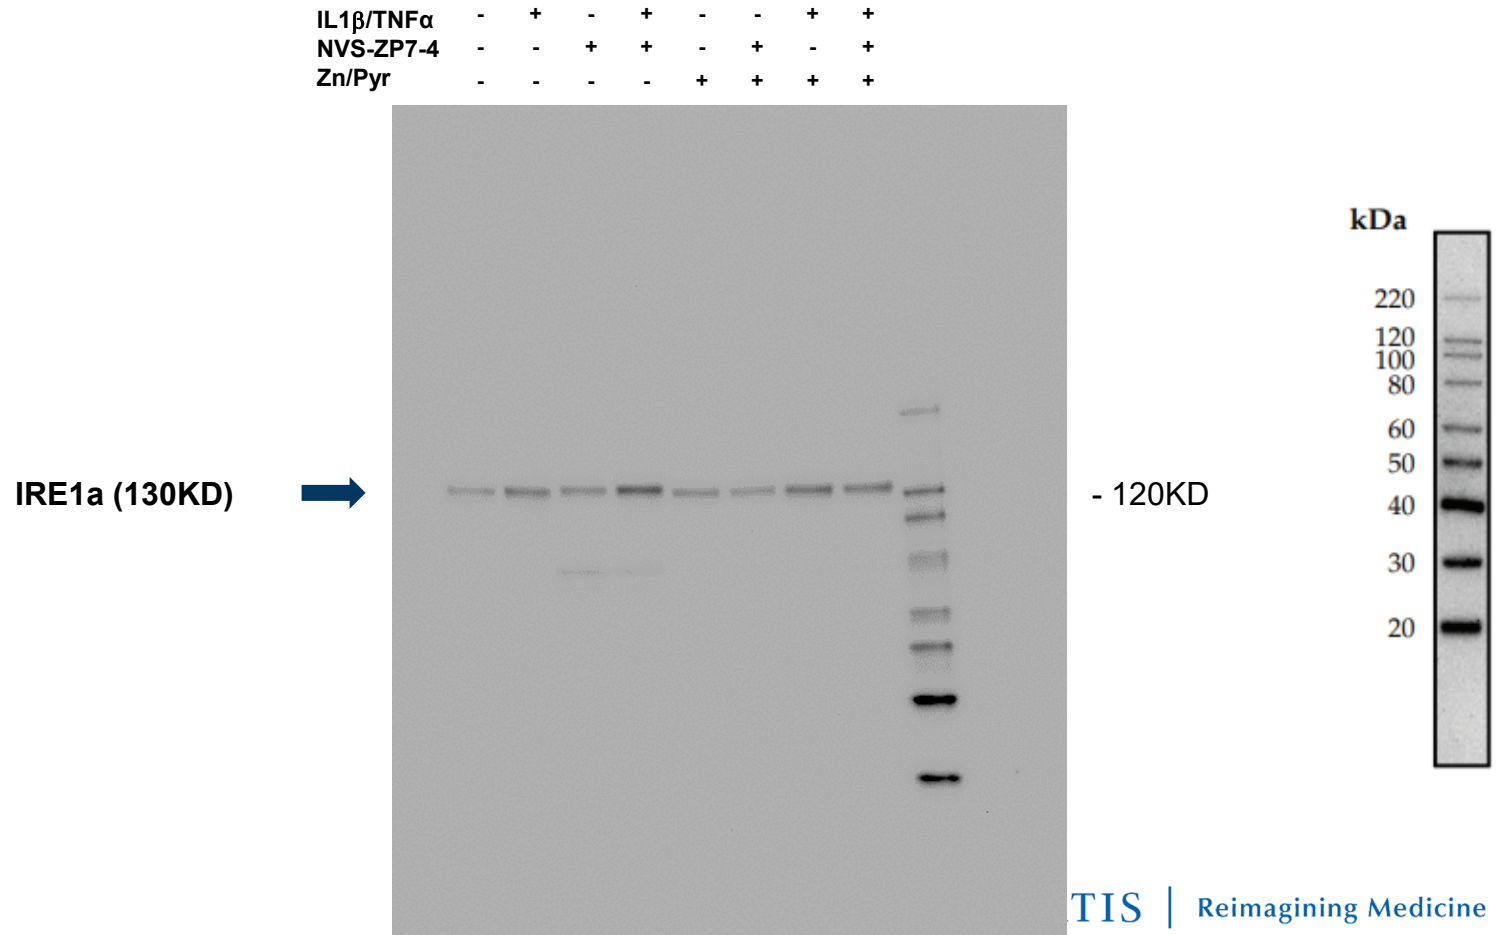

Fig S5

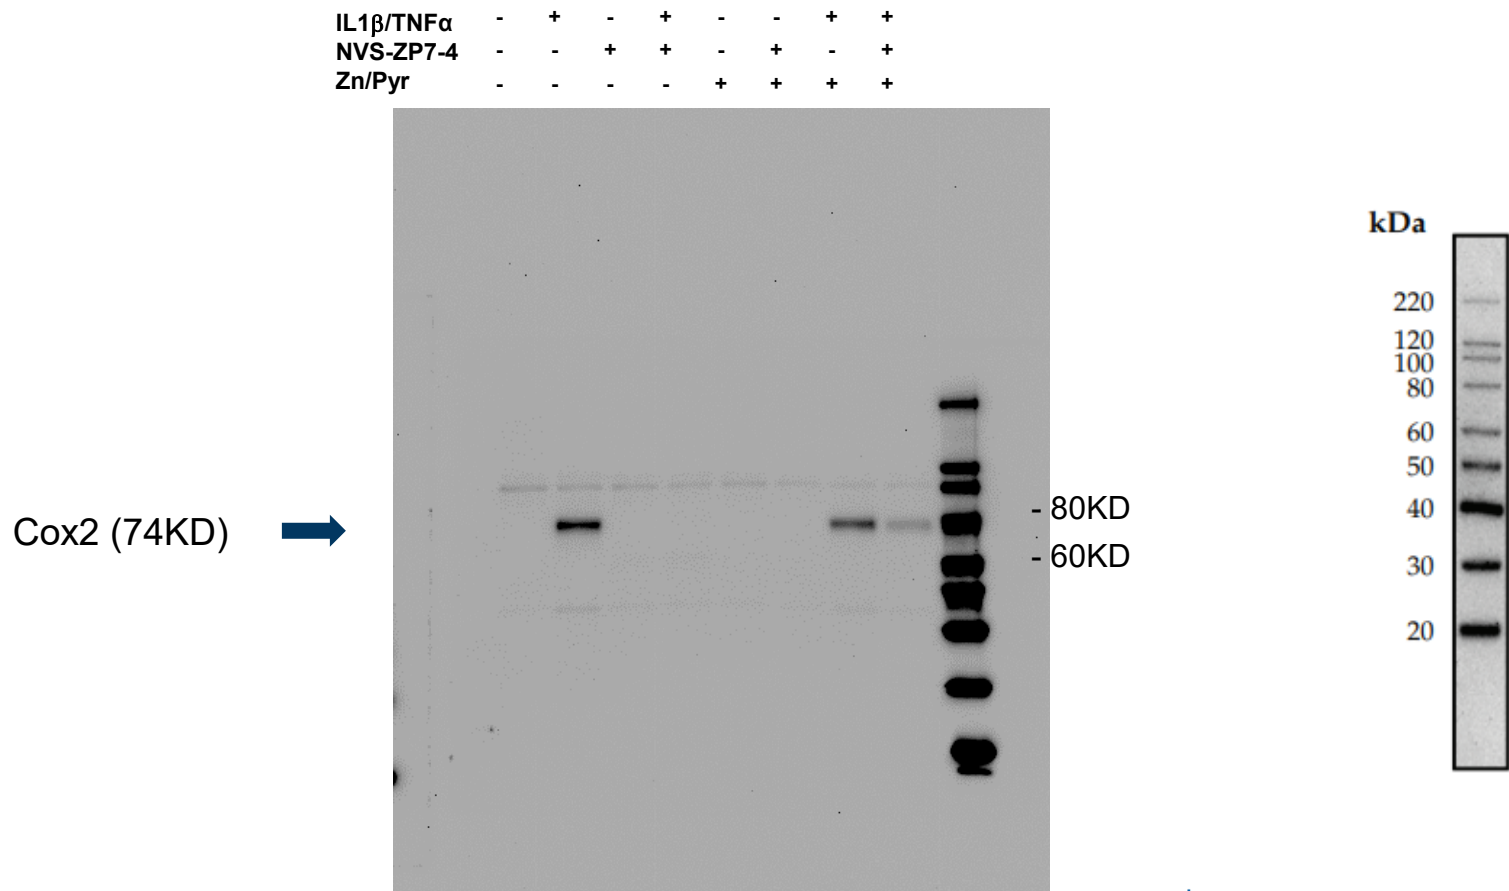

Fig S5

|                           |   |   |   |   |   |   |   |   |
|---------------------------|---|---|---|---|---|---|---|---|
| IL1 $\beta$ /TNF $\alpha$ | - | + | - | + | - | - | + | + |
| NVS-ZP7-4                 | - | - | + | + | - | + | - | + |
| Zn/Pyr                    | - | - | - | - | + | + | + | + |

Occludin (65KD)

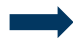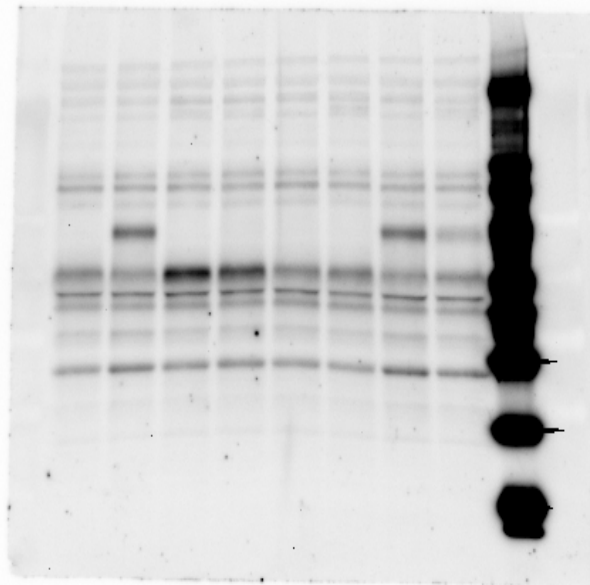

- 60KD

kDa

220  
120  
100  
80  
60  
50  
40  
30  
20

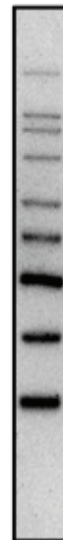

Fig S5

|                           |   |   |   |   |   |   |   |   |
|---------------------------|---|---|---|---|---|---|---|---|
| IL1 $\beta$ /TNF $\alpha$ | - | + | - | + | - | - | + | + |
| NVS-ZP7-4                 | - | - | + | + | - | + | - | + |
| Zn/Pyr                    | - | - | - | - | + | + | + | + |

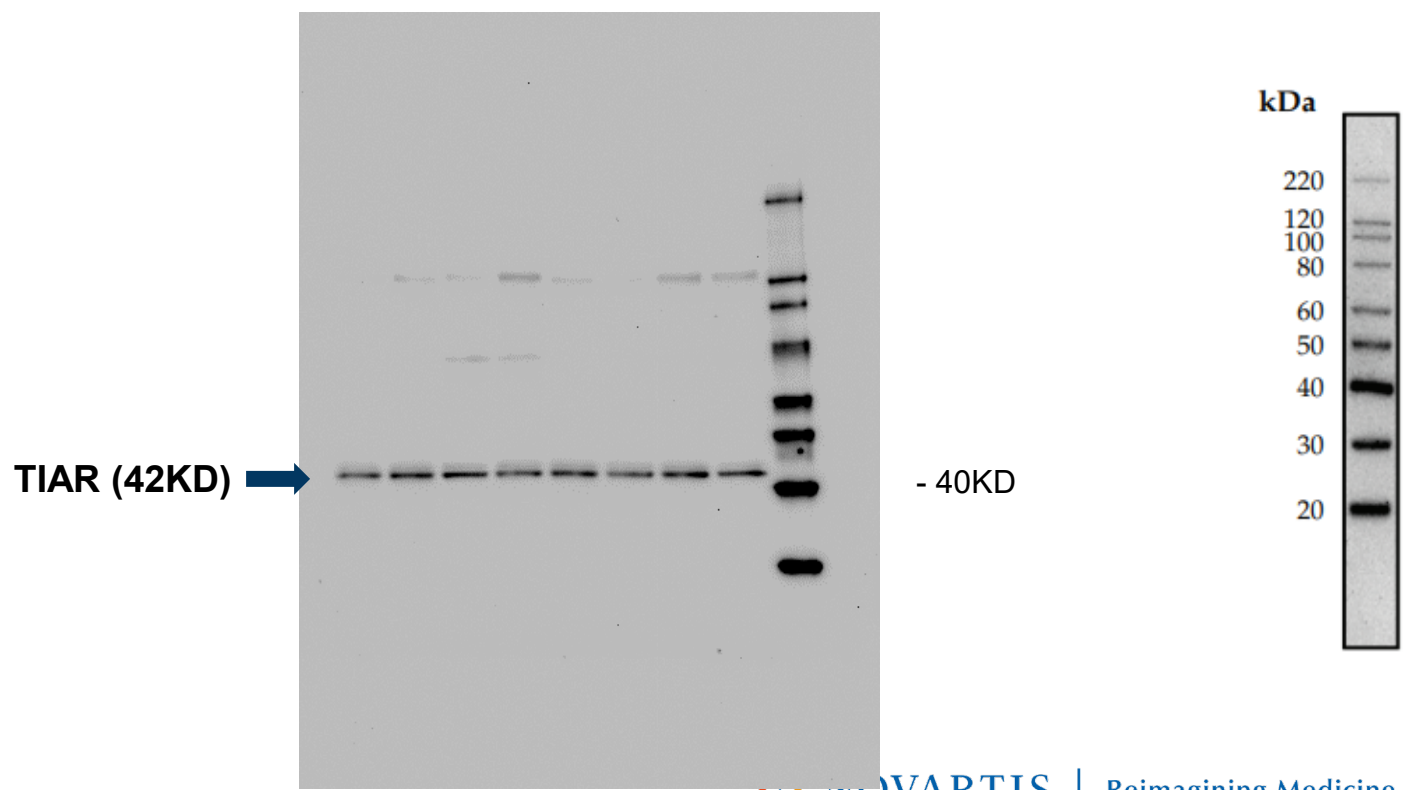

Fig S5

|                           |   |   |   |   |   |   |   |   |
|---------------------------|---|---|---|---|---|---|---|---|
| IL1 $\beta$ /TNF $\alpha$ | - | + | - | + | - | - | + | + |
| NVS-ZP7-4                 | - | - | + | + | - | + | - | + |
| Zn/Pyr                    | - | - | - | - | + | + | + | + |

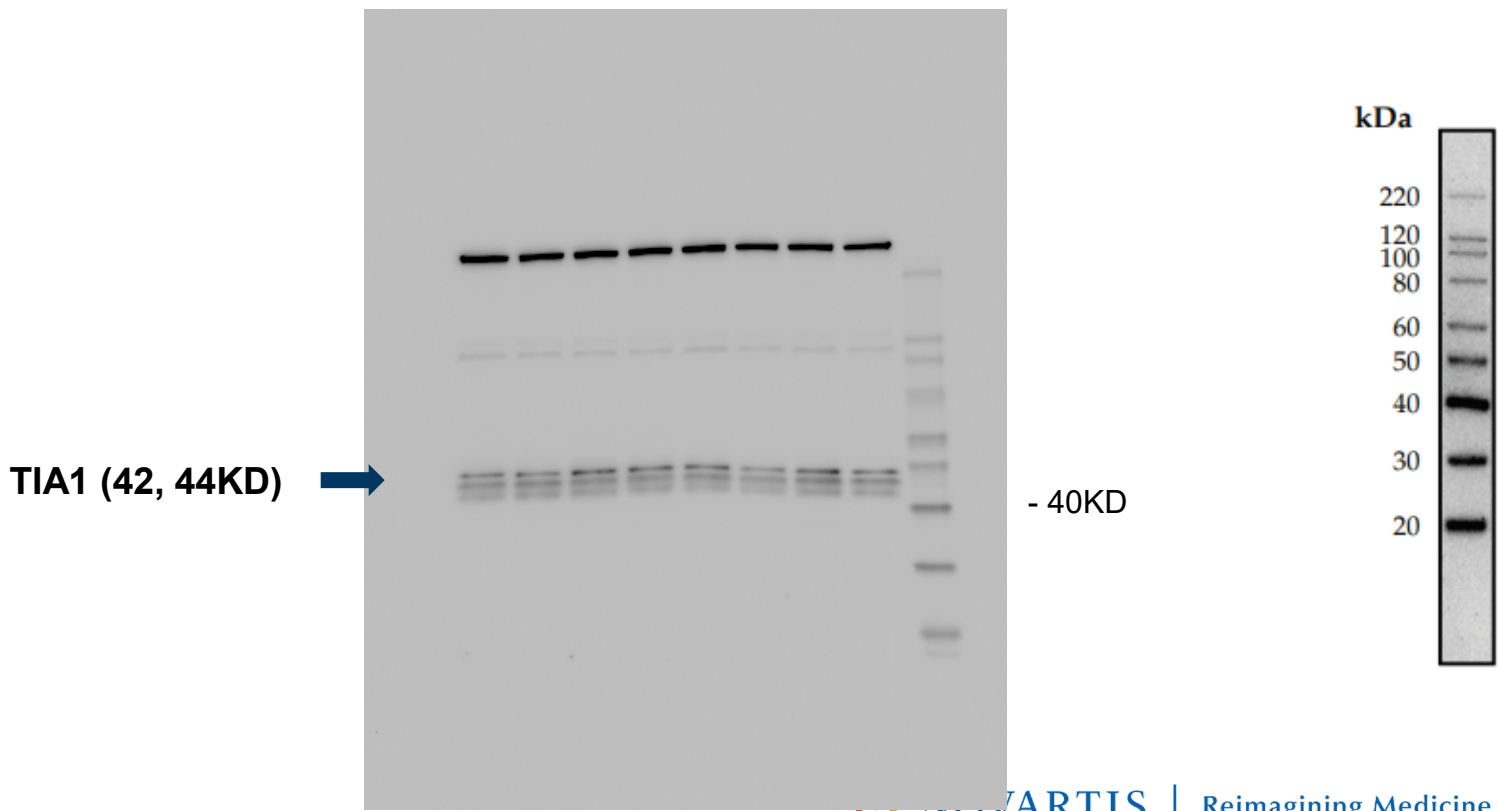



Fig S5

|                           |   |   |   |   |   |   |   |   |
|---------------------------|---|---|---|---|---|---|---|---|
| IL1 $\beta$ /TNF $\alpha$ | - | + | - | + | - | - | + | + |
| NVS-ZP7-4                 | - | - | + | + | - | + | - | + |
| Zn/Pyr                    | - | - | - | - | + | + | + | + |

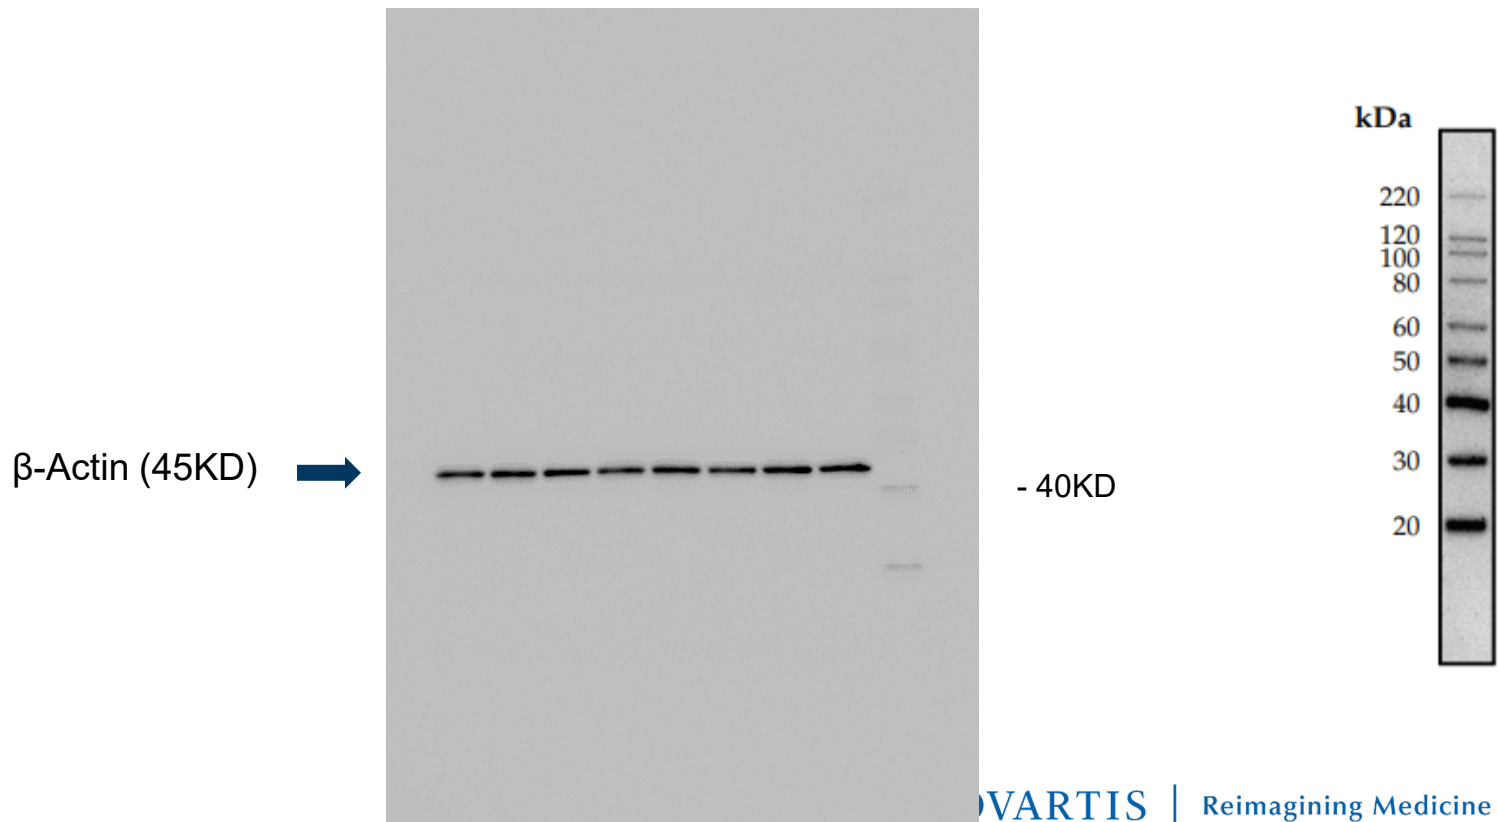

Supplement: pone.0271656.s007.pdf [file pone.0271656.s007.pdf]
